# Supplementary material for: Depression, Anxiety, and Self-Directed Violence in Women With Endometriosis: A Retrospective Matched-Cohort Study
Source: PubMed Central journal article supplement — Am J Epidemiol. 2020 Nov 13;190(5):843–52. doi: 10.1093/aje/kwaa249 (PMC8247611; doi:10.1093/aje/kwaa249), 2020-11-13
Supplement: web_material_kwaa249.pdf [file web_material_kwaa249.pdf]

**Depression, Anxiety, and Self-directed Violence in Women with Endometriosis: A  
Retrospective Matched Cohort Study**

Stephanie J. Estes, Carrie E. Huisingsh, Stephanie E. Chiuve, Natalia Petruski-Ivleva, and Stacey  
A. Missmer

Web Appendix 1

Web Figure 1

Web Tables 1-7

## Web Appendix 1

### **Web Figure 1.**

Figure Legend: Cohort selection for the women with endometriosis and a referent population of women without endometriosis. The cohort entry date for women with endometriosis was the date of the second claim or the date of the endometriosis claim following the laparoscopic procedure, whichever came first. The index date for the referent group was the date of a general medical or annual gynecological exam for the referent group. Dataset: Optum CDM May 1, 2000 through March 31, 2019

**Web Table 1.** Baseline Characteristics in Women With Endometriosis by Endometriosis Definition, Optum Clinformatics® DataMart, 2000-2019

**Web Table 2.** Codes for Defining Endometriosis, Covariates, and Outcomes

**Web Table 3.** Additional Baseline Characteristics of Women With and Without Endometriosis, Optum Clinformatics® DataMart, 2000-2019

**Web Table 4.** Incidence of Anxiety and Depression Based on Alternative Outcome Definitions, Optum Clinformatics® DataMart, 2000-2019

**Web Table 5.** Association Between Endometriosis and Anxiety and Depression Based on Alternative Outcome Definitions, Optum Clinformatics® DataMart, 2000-2019

**Web Table 6.** Incidence of Anxiety, Depression, and Self-directed Violence, Optum Clinformatics® DataMart, 2000-2019

**Web Table 7.** Association Between Laparoscopically Confirmed Endometriosis and Anxiety, Depression, and Self-directed Violence, Optum Clinformatics® DataMart, 2000-2019

This supplementary material has been provided by the authors to give readers additional information about their work.

Web Figure 1

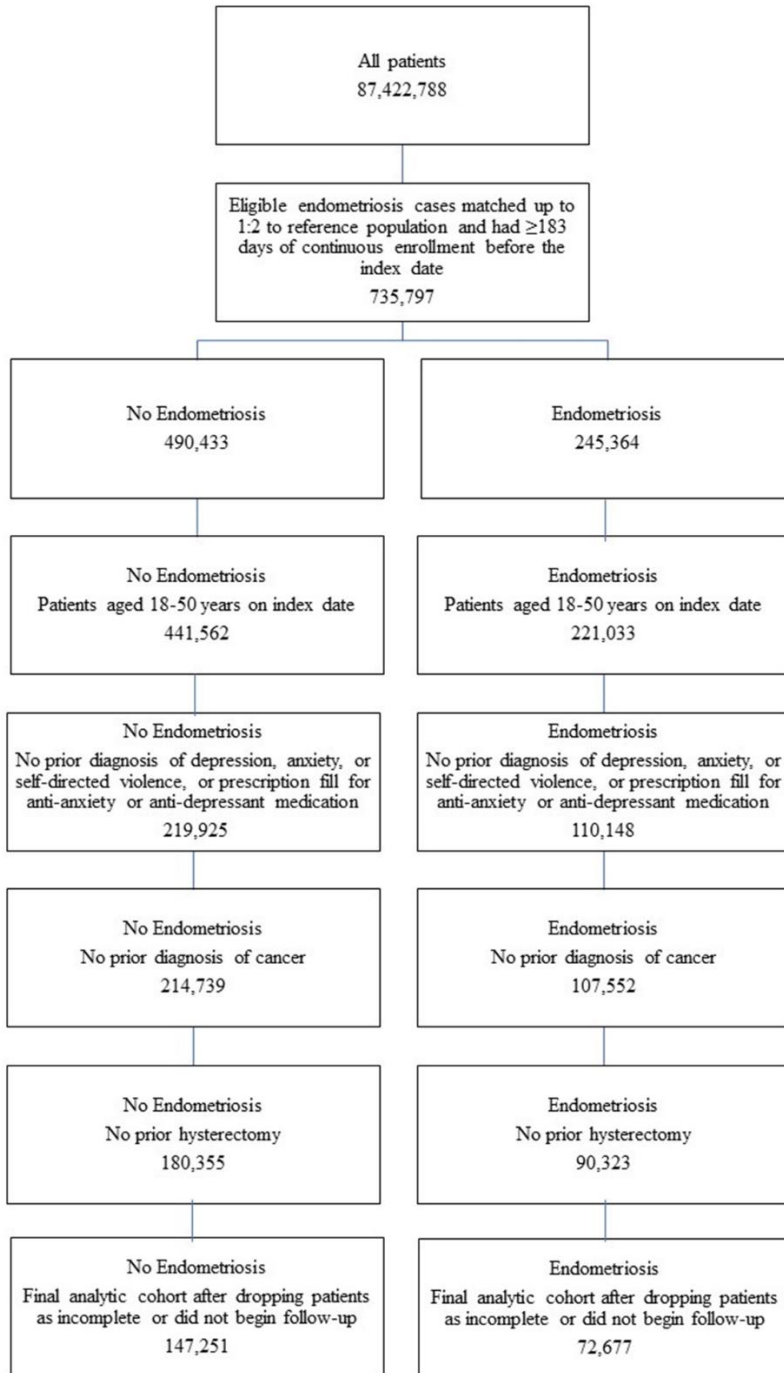

Web Table 1. Baseline Characteristics in Women With Endometriosis by Endometriosis Definition, Optum Clinformatics® DataMart, 2000-2019<sup>a,b</sup>

|                                                    | Laparoscopy<br>Confirmed<br>Endometriosis<br>N=33,830 | Not Laparoscopy<br>Confirmed<br>Endometriosis<br>N=40,173 | Difference           |
|----------------------------------------------------|-------------------------------------------------------|-----------------------------------------------------------|----------------------|
| <b>Demographics</b>                                |                                                       |                                                           | -                    |
| Age, mean (SD)                                     | 32.83 (6.99)                                          | 35.07 (7.45)                                              | -2.24 (-2.34, -2.13) |
| Race/Ethnicity <sup>c</sup>                        |                                                       |                                                           |                      |
| White, non-Hispanic                                | 24,512 (72.5%)                                        | 27,028 (67.3%)                                            | 5.2% (4.5%, 5.8%)    |
| Asian, non-Hispanic                                | 1,640 (4.8%)                                          | 2,779 (6.9%)                                              | -2.1% (-2.4%, -1.7%) |
| Black, non-Hispanic                                | 3,521 (10.4%)                                         | 4,949 (12.3%)                                             | -1.9% (-2.4%, -1.5%) |
| Hispanic                                           | 4,157 (12.3%)                                         | 5,417 (13.5%)                                             | -1.2% (-1.7%, -0.7%) |
| Region of Residence                                |                                                       |                                                           |                      |
| Northeast                                          | 2,282 (6.7%)                                          | 4,223 (10.5%)                                             | -3.8% (-4.2%, -3.4%) |
| Midwest                                            | 9,506 (28.1%)                                         | 9,603 (23.9%)                                             | 4.2% (3.6%, 4.8%)    |
| South                                              | 17,164 (50.7%)                                        | 18,470 (46.0%)                                            | 4.8% (4.0%, 5.5%)    |
| West                                               | 4,878 (14.4%)                                         | 7,877 (19.6%)                                             | -5.2% (-5.7%, -4.6%) |
| <b>Gynecological/Reproductive Health Variables</b> |                                                       |                                                           |                      |

|                                       | Laparoscopy    | Not Laparoscopy | Difference                  |
|---------------------------------------|----------------|-----------------|-----------------------------|
|                                       | Confirmed      | Confirmed       |                             |
|                                       | Endometriosis  | Endometriosis   |                             |
|                                       | N=33,830       | N=40,173        |                             |
| Any Pain Symptoms <sup>d</sup>        | 24,907 (73.6%) | 24,853 (61.9%)  | 11.8% (11.1%, 12.4%)        |
| Dysmenorrhea                          | 13,426 (39.7%) | 10,600 (26.4%)  | 13.3% (12.6%, 14.0%)        |
| Dyspareunia                           | 4,985 (14.7%)  | 3,307 (8.2%)    | 6.5% (6.0%, 7.0%)           |
| Pelvic Pain                           | 17,768 (52.5%) | 19,357 (48.2%)  | 4.3% (3.6%, 5.1%)           |
| Infertility <sup>e</sup>              | 13,508 (39.9%) | 12,090 (30.1%)  | 9.8% (9.1%, 10.5%)          |
| Infertility Diagnosis                 | 8,611 (25.5%)  | 5,774 (14.4%)   | 11.1% (10.5%, 11.7%)        |
| Infertility Treatment,<br>Procedures  | 8,807 (26.0%)  | 7,864 (19.6%)   | 6.5% (5.8%, 7.1%)           |
| Infertility Treatment,<br>Medications | 10,950 (32.4%) | 9,978 (24.8%)   | 7.5% (6.9%, 8.2%)           |
| Prior Pregnancy                       | 5,572 (16.5%)  | 5,879 (14.6%)   | 1.8% (1.3%, 2.4%)           |
| Uterine Fibroids                      | 5,208 (15.4%)  | 7,459 (18.6%)   | -3.2% (-3.7%, -2.6%)        |
| Use of GnRH Agonists                  | 653 (1.9%)     | 5,667 (14.1%)   | -12.2% (-12.5%, -<br>11.8%) |
| Use of Non-Opioid Analgesics          | 14,528 (42.9%) | 13,781 (34.3%)  | 8.6% (7.9%, 9.3%)           |

|                                              | Laparoscopy    | Not Laparoscopy | Difference           |
|----------------------------------------------|----------------|-----------------|----------------------|
|                                              | Confirmed      | Confirmed       |                      |
|                                              | Endometriosis  | Endometriosis   |                      |
|                                              | N=33,830       | N=40,173        |                      |
| Use of Opioid Analgesics                     | 25,146 (74.3%) | 19,585 (48.8%)  | 25.6% (24.9%, 26.3%) |
| Use of Combined Oral<br>Contraceptives       | 12,032 (35.6%) | 14,279 (35.5%)  | 0.0% (-0.7%, 0.7%)   |
| <b>General Pain-Related Comorbidities</b>    |                |                 |                      |
| Chronic Headaches/Migraines                  | 6,044 (17.9%)  | 7,167 (17.8%)   | 0.0% (-0.5%, 0.6%)   |
| Chronic Low Back Pain                        | 7,295 (21.6%)  | 8,543 (21.3%)   | 0.3% (0.3%, 0.9%)    |
| Fibromyalgia                                 | 1,930 (5.7%)   | 2,410 (6.0%)    | -0.3% (-0.6%, 0.0%)  |
| Interstitial Cystitis                        | 307 (0.9%)     | 324 (0.8%)      | 0.1% (0.0%, 0.2%)    |
| Irritable Bowel Syndrome                     | 1,433 (4.2%)   | 1,694 (4.2%)    | 0.0% (-0.3%, 0.3%)   |
| <b>Immunological Comorbidities</b>           |                |                 |                      |
| Allergic Rhinitis                            | 6,141 (18.2%)  | 6,844 (17.0%)   | 1.1% (0.6%, 1.7%)    |
| Allergies                                    | 7,883 (23.3%)  | 8,732 (21.7%)   | 1.6% (1.0%, 2.2%)    |
| Asthma                                       | 2,983 (8.8%)   | 3,504 (8.7%)    | 0.1% (0.3%, 0.5%)    |
| Eczema                                       | 2,970 (8.8%)   | 3,357 (8.4%)    | 0.4% (0.0%, 0.8%)    |
| <b>Other Comorbidities or Medication Use</b> |                |                 |                      |

|                            | Laparoscopy    | Not Laparoscopy | Difference           |
|----------------------------|----------------|-----------------|----------------------|
|                            | Confirmed      | Confirmed       |                      |
|                            | Endometriosis  | Endometriosis   |                      |
|                            | N=33,830       | N=40,173        |                      |
| Diabetes Mellitus, Type II | 964 (2.8%)     | 1,410 (3.5%)    | -0.7% (-0.9%, -0.4%) |
| Fatigue                    | 6,738 (19.9%)  | 8,165 (20.3%)   | -0.4% (-1.0%, 0.2%)  |
| Hyperlipidemia             | 3,605 (10.7%)  | 5,135 (12.8%)   | -2.1% (-2.6%, -1.7%) |
| Hypertension               | 2,344 (6.9%)   | 3,836 (9.5%)    | -2.6% (-3.0%, -2.2%) |
| Hypothyroidism             | 2,945 (8.7%)   | 3,809 (9.5%)    | -0.8% (-1.2%, -0.4%) |
| Thyroid Disease            | 3,682 (10.9%)  | 4,537 (11.3%)   | -0.4% (-0.9%, 0.0%)  |
| Vitamin D Deficiency       | 787 (2.3%)     | 1,327 (3.3%)    | -1.0% (-1.2%, -0.7%) |
| Use of Antihypertensives   | 2,065 (6.1%)   | 3,454 (8.6%)    | -2.5% (-2.9%, -2.1%) |
| Use of Corticosteroids     | 10,245 (30.3%) | 12,010 (29.9%)  | 0.4% (-0.3%, 1.1%)   |

<sup>a</sup>Patients were excluded if they had a prior diagnosis of depression (dx OR rx), anxiety (dx OR rx), self-directed violence, prior prescription fill of an anti-anxiety or anti-depressant medication, prior diagnosis of cancer, or prior hysterectomy.

<sup>b</sup>All values are n (%) unless otherwise specified.

<sup>c</sup>Data contains four mutually exclusive categories based on a combination of self-reported race/ethnicity and imputed race/ethnicity at the census tract level

<sup>d</sup>Includes dysmenorrhea, dyspareunia and pelvic pain

<sup>e</sup>Includes infertility diagnosis, procedures, medications, medical encounters, and use of GnRH antagonists



Web Table 2. Codes for Defining Endometriosis, Covariates, and Outcomes

| Measure                                           | Definition                                                                                                                                                                                                                             |
|---------------------------------------------------|----------------------------------------------------------------------------------------------------------------------------------------------------------------------------------------------------------------------------------------|
| <b>Exposure</b>                                   |                                                                                                                                                                                                                                        |
| Endometriosis, diagnosis codes only               | ICD- 9: 617.0, 617.1, 617.2, 617.3, 617.4, 617.5, 617.8, 617.9<br>ICD-10: N80.0, N80.1, N80.2, N80.3, N80.4, N80.5, N80.8, N80.9                                                                                                       |
| Laparoscopy                                       | CPT/HCPCS codes: 49321, 49322, 49323, 49329, 58551, 58660, 58662, 58670, 58671, 58672, 58673, 58679, 49320                                                                                                                             |
| General Medical Exam or Annual Gynecological Exam | ICD-9: V70, V70.0, V70.3, V70.5, V70.8, V70.9, V72.31<br>ICD-10: Z00.0, Z00.00, Z00.01, Z01.41, Z01.411, Z01.419<br>CPT/HCPCS: 99386, S0610, S0612, S0613                                                                              |
| <b>Outcomes</b>                                   |                                                                                                                                                                                                                                        |
| Anxiety                                           | ICD-9: 300.00, 300.02, 300.0, 293.84, 300.3, 308.3, 309.8, 300, 300.01, 300.09, 309.81, 309.82, 309.83, 309.89, 309.21, 309.24, 309.28<br>ICD-10: F41.1, F41, F41.0, F41.3, F41.8, F41.9, F43.0, F43.10, F43.12, F43.22, F43.23, F43.8 |
| Depression                                        | ICD-9: 296.2, 296.3, 298.0, 300.4, 309, 309.0, 309.1, 309.28, 311, 296.20, 296.21, 296.22, 296.23, 296.24, 296.25, 296.26, 296.30, 296.31, 296.32, 296.33, 296.34, 296.35, 296.36                                                      |

| Measure                | Definition                                                                                                                                                                                                                                                                                                                                                                                                                                                                                                                                                                                                                                                                                                                                                                                                                                                                                                                                                                                                                                                                                                                                                                                                                                                                                                                                                                     |
|------------------------|--------------------------------------------------------------------------------------------------------------------------------------------------------------------------------------------------------------------------------------------------------------------------------------------------------------------------------------------------------------------------------------------------------------------------------------------------------------------------------------------------------------------------------------------------------------------------------------------------------------------------------------------------------------------------------------------------------------------------------------------------------------------------------------------------------------------------------------------------------------------------------------------------------------------------------------------------------------------------------------------------------------------------------------------------------------------------------------------------------------------------------------------------------------------------------------------------------------------------------------------------------------------------------------------------------------------------------------------------------------------------------|
|                        | ICD-10: F32, F32.0, F32.1, F32.2, F32.3, F32.4, F32.5, F32.8, F32.9, F33, F33.0, F33.1, F33.2, F33.3, F33.4, F33.40, F33.41, F33.42, F33.8, F33.9, F34.1                                                                                                                                                                                                                                                                                                                                                                                                                                                                                                                                                                                                                                                                                                                                                                                                                                                                                                                                                                                                                                                                                                                                                                                                                       |
| Self-Directed Violence | <p>ICD-9: V62.84, E950, E950.0, E950.1, E950.2, E950.3, E950.4, E950.5, E950.6, E950.7, E950.8, E950.9, E951, E951.0, E951.1, E951.8, E952, E952.0, E952.1, E952.8, E952.9, E953, E953.0, E953.1, E953.8, E953.9, E954, E955, E955.0, E955.1, E955.2, E955.3, E955.4, E955.5, E955.6, E955.7, E955.9, E956, E957, E957.0, E957.1, E957.2, E957.9, E958, E958.0, E958.1, E958.2, E958.3, E958.4, E958.5, E958.6, E958.7, E958.8, E958.9, E959</p> <p>ICD-10: R45.851, T14.91, T36.1X2, T36.7X2, T42.2X2, T42.2X2A, T42.2X2D, T42.2X2S, T42.3X2, T42.3X2A, T42.3X2D, T42.3X2S, T42.4X2, T42.4X2A, T42.4X2D, T42.4X2S, X71.0XXA, X71.1XXA, X71.2, X71.3XXA, X71.8XXA, X71.9XXA, X72.XXXA, X72.XXXD, X72.XXXS, X73.0XXA, X73.0XXD, X73.0XXS, X73.1, X73.1XXA, X73.2XXA, X73.2XXD, X73.8XXA, X73.8XXS, X73.9XXA, X73.9XXD, X74.01XA, X74.01XS, X74.02XA, X74.09XA, X74.8XXA, X74.8XXD, X74.9XXA, X74.9XXD, X74.9XXS, X75, X76.XXXA, X76.XXXD, X76.XXXS, X77.1XXA, X77.2XXA, X77.3XXA, X77.8XXA, X77.9XXA, X77.9XXD, X78, X78.0, X78.0XXA, X78.0XXD, X78.0XXS, X78.1XXA, X78.1XXD, X78.1XXS, X78.2XXA, X78.8XXA, X78.8XXD, X78.8XXS, X78.9XXA, X78.9XXD, X78.9XXS, X79.XXXA, X79.XXXD, X79.XXXS, X80.XXXA, X80.XXXD, X81.0XXA, X81.0XXS, X81.1XXA, X81.8XXA, X82.0XXA, X82.0XXD, X82.2XXA, X82.8XXA, X82.8XXD, X82.8XXS, X83.0XXA, X83.2XXA, X83.8XXA, X83.8XXD, X83.8XXS, Z91.5</p> |
| Anti-depressant use    | AHFSC Therapeutic Category: 281604, 28160412, 28160416, 28160420, 28160424, 28160428, 28160492                                                                                                                                                                                                                                                                                                                                                                                                                                                                                                                                                                                                                                                                                                                                                                                                                                                                                                                                                                                                                                                                                                                                                                                                                                                                                 |

| Measure | Definition                                                                                                                                                                                                                                                                                                                                                                                                                                                                                                                                                                                                                                                                                                                                                                                                                                                                                                                                                                                                                                                                                                                                                                                                                                                                                                                                                                                                  |
|---------|-------------------------------------------------------------------------------------------------------------------------------------------------------------------------------------------------------------------------------------------------------------------------------------------------------------------------------------------------------------------------------------------------------------------------------------------------------------------------------------------------------------------------------------------------------------------------------------------------------------------------------------------------------------------------------------------------------------------------------------------------------------------------------------------------------------------------------------------------------------------------------------------------------------------------------------------------------------------------------------------------------------------------------------------------------------------------------------------------------------------------------------------------------------------------------------------------------------------------------------------------------------------------------------------------------------------------------------------------------------------------------------------------------------|
|         | <p>NDC Generic Name: AMITRIPTYLINE HCL, AMITRIPTYLINE HCL/CHLORDIAZEPOXIDE, AMOXAPINE, CITALOPRAM HYDROBROMIDE, DESIPRAMINE HCL, DESVENLAFAXINE, DESVENLAFAXINE FUMARATE, DESVENLAFAXINE SUCCINATE, DOXEPIN HCL, DULOXETINE HCL, ESCITALOPRAM OXALATE, FLUOXETINE, FLUOXETINE HCL, FLUVOXAMINE MALEATE, IMPRAMINE HCL, IMPRAMINE PAMOATE, LEVOMILNACIPRAN HCL, MAPROTILINE HCL, NORTRIPTYLINE HCL, PAROXETINE HCL, PAROXETINE MESYLATE, PERPHENAZINE/AMITRIPTYLINE HCL, PROTRIPTYLINE HCL, SERTRALINE HCL, TRIMIPRAMINE MALEATE, VENLAFAXINE HCL, VILAZODONE HCL, BUPROPION HCL, MIRTAZAPINE, NEFAZODONE HCL, PHENELZINE SULFATE, TRANYLCPROMINE SULFATE, TRAZODONE HCL, ISOCARBOXAZID</p> <p>NDC Brand Name: ETRAFON 2-10, ETRAFON 2-25, TRIAVIL 10-2, TRIAVIL 2-10, TRIAVIL 2-25, TRIAVIL 25-2, TRIAVIL 25-4, TRIAVIL 4-10, TRIAVIL 4-25, TRIAVIL 4-50, LUVOX, LUVOX CR, ELAVIL, ENDEP, VANATRIP, LIMBITROL, LIMBITROL DS, ASENDIN, APLENZIN, BUPROBAN, FORFIVO XL, WELLBUTRIN, WELLBUTRIN SR, WELLBUTRIN XL, ZYBAN, BUDEPRION SR, BUDEPRION XL, CELEXA, CITALOPRAM, NORPRAMIN, KHEDEZLA, PRISTIQ, SINEQUAN, SILENOR, ZONALON, ADAPIN, CYMBALTA, IRENKA, LEXAPRO, RAPIFLUX, PROZAC, PROZAC WEEKLY, SARAFEM, FETZIMA, LUDIOMIL, REMERON, SERZONE, AVENTYL HCL, PAMELOR, SYMBYAX, PAXIL, PAXIL CR, PEXEVA, NARDIL, VIVACTIL, ZOLOFT, PARNATE, DESYREL, SURMONTIL, EFFEXOR, EFFEXOR XR, VIIBRYD, MARPLAN</p> |

| Measure           | Definition                                                                                                                                                                                                                                                                                                                                                                                                                                                                                                                                                                                                                                                                                                                                                                                                                                                                                                                                                                                       |
|-------------------|--------------------------------------------------------------------------------------------------------------------------------------------------------------------------------------------------------------------------------------------------------------------------------------------------------------------------------------------------------------------------------------------------------------------------------------------------------------------------------------------------------------------------------------------------------------------------------------------------------------------------------------------------------------------------------------------------------------------------------------------------------------------------------------------------------------------------------------------------------------------------------------------------------------------------------------------------------------------------------------------------|
| Anti-anxiety use  | <p>NDC Generic Name: ALPRAZOLAM, ATENOLOL, CHLORDIAZEPOXIDE, CLONAZEPAM, DIAZEPAM, ESCITALOPRAM OXALATE, FLUOXETINE, GABAPENTIN, LORAZEPAM, OXAZEPAM, PREGABALIN, AMITRIPTYLINE HCL/CHLORDIAZEPOXIDE, PROPRANOLOL HCL, SERTRALINE HCL, TRANYLCPROMINE SULFATE, VENLAFAXINE HCL, AMITRIPTYLINE HCL, BUSPIRONE HCL, CHLORAL HYDRATE, CLOMIPRAMINE HCL, CLORAZEPATE DIPOTASSIUM, DESIPRAMINE HCL, HYDROXYZINE HCL, IMIPRAMINE HCL, NORTRIPTYLINE HCL, PAROXETINE HCL, PAROXETINE MESYLATE, PHENELZINE SULFATE</p> <p>NDC Brand Name: ANAFRANIL, ATIVAN, BUSPAR, EFFEXOR, INDERAL, KLONOPIN, LEXAPRO, LIBRIUM, LYRICA, NARDIL, NEURONTIN, NORPRAMIN, PAMELOR, PARNATE, PAXIL, PROZAC, SERAX, TENORMIN, TOFRANIL, VALIUM, XANAX, ZOLOFT, XANAX XR, RAPIFLUX, PROZAC WEEKLY, SARAFEM, LORAZEPAM INTENSOL, ENDEP, VANATRIP, LIMBITROL, LIMBITROL DS, VANSPAR, AQUACHLORAL, NOCTEC, TRANXENE T-TAB, TRANXENE-T, VISTARIL, VISTARIL IM, HYZINE, VISTAJECT, REZINE, TOFRANIL-PM, AVENTYL HCL, PAXIL CR</p> |
| <b>Covariates</b> |                                                                                                                                                                                                                                                                                                                                                                                                                                                                                                                                                                                                                                                                                                                                                                                                                                                                                                                                                                                                  |
| Dysmenorrhea      | <p>ICD-9: 625.3</p> <p>ICD-10: N94.6</p>                                                                                                                                                                                                                                                                                                                                                                                                                                                                                                                                                                                                                                                                                                                                                                                                                                                                                                                                                         |
| Dyspareunia       | <p>ICD-9: 625.0</p> <p>ICD-10: N94.1</p>                                                                                                                                                                                                                                                                                                                                                                                                                                                                                                                                                                                                                                                                                                                                                                                                                                                                                                                                                         |

| Measure                                                  | Definition                                                                                                                                                                                                                                                                                                      |
|----------------------------------------------------------|-----------------------------------------------------------------------------------------------------------------------------------------------------------------------------------------------------------------------------------------------------------------------------------------------------------------|
| Pelvic Pain                                              | <p>ICD-9: 625.8, 625.9, 789.00, 789.01, 789.02, 789.03, 789.04, 789.05, 789.06, 789.07, 789.09</p> <p>ICD-10: N94.89, R10.10, R10.11, R10.12, R10.13, R10.2, R10.30, R10.31, R10.32, R10.33, R10.84, R10.9</p>                                                                                                  |
| Any Infertility                                          |                                                                                                                                                                                                                                                                                                                 |
| Infertility diagnosis                                    | <p>ICD-9: 628.0, 628.1, 628.2, 628.3, 628.4, 628.8, 628.9, 628</p> <p>ICD-10: N97, N97.0, N97.1, N97.2, N97.8, N97.9</p>                                                                                                                                                                                        |
| Use of Fertility Treatment, medical encounter            | <p>ICD-9: V26, V26.1, V26.2, V26.21, V26.4, V26.41, V26.42, V26.49, V26.81, V26.82, V26.89, V26.9</p> <p>ICD-10: Z31, Z31.6, Z31.61, Z31.62, Z31.69, Z31.8, Z31.9</p>                                                                                                                                           |
| Use of Fertility Treatment (procedures)                  | <p>ICD-9: 69.92</p> <p>CPT/HCPCS: 58321, 58322, 58345, 58752, 58760, 58770, 58974, 58976, 80415, 80426, 83001, 83002, 84830, 89253, 89254, 89255, 89258, 89268, 89272, 89280, 89281, 89290, 89291, S4035, S4042</p>                                                                                             |
| Use of Fertility Treatment Medications, excluding Lupron | <p>AHFSC Therapeutic Category: LEUPROLIDE ACETATE, LEUPROLIDE ACETATE/LIDOCAINE HCL, LEUPROLIDE ACETATE/NORETHINDRONE ACETATE</p> <p>NDC Generic Name: CLOMIPHENE CITRATE, UROFOLLITROPIN, CHORIONIC GONADOTROPIN, HUMAN, MENOTROPINS, FOLLITROPIN ALFA, RECOMB, CHORIOGONADOTROPIN ALFA, FOLLITROPIN BETA,</p> |

| Measure                | Definition                                                                                                                                                                                                                                                                                                                                                                                                                                                                                                                                                                                                                                                                                                                                                                                                                                                                                                                                                                                                                                                                                                                                                                                                                                                                                                                                                                                                                                                                          |
|------------------------|-------------------------------------------------------------------------------------------------------------------------------------------------------------------------------------------------------------------------------------------------------------------------------------------------------------------------------------------------------------------------------------------------------------------------------------------------------------------------------------------------------------------------------------------------------------------------------------------------------------------------------------------------------------------------------------------------------------------------------------------------------------------------------------------------------------------------------------------------------------------------------------------------------------------------------------------------------------------------------------------------------------------------------------------------------------------------------------------------------------------------------------------------------------------------------------------------------------------------------------------------------------------------------------------------------------------------------------------------------------------------------------------------------------------------------------------------------------------------------------|
|                        | <p>RECOMB, HISTRELIN ACETATE, LUTROPIN ALFA, NAFARELIN ACETATE</p> <p>CPT/HCPCS: 80415, 80426, 82670, 83001, 83002, 84144, J0725, J3355, S0122, S0126, S0128</p>                                                                                                                                                                                                                                                                                                                                                                                                                                                                                                                                                                                                                                                                                                                                                                                                                                                                                                                                                                                                                                                                                                                                                                                                                                                                                                                    |
| Use of GnRH Antagonist | <p>NDC Generic Name: DEGARELIX ACETATE, ABARELIX, CETRORELIX ACETATE, GANIRELIX ACETATE, FOLLITROPIN BETA, RECOMB/GANIRELIX ACETATE</p>                                                                                                                                                                                                                                                                                                                                                                                                                                                                                                                                                                                                                                                                                                                                                                                                                                                                                                                                                                                                                                                                                                                                                                                                                                                                                                                                             |
| Prior Pregnancy        | <p>ICD-9: 630, 631, 631.0, 631.8, 632, 633, 633.0, 633.00, 633.01, 633.1, 633.10, 633.11, 633.2, 633.20, 633.21, 633.8, 633.80, 633.81, 633.9, 633.90, 633.91, 634, 634.0, 634.00, 634.01, 634.02, 634.1, 634.10, 634.11, 634.12, 634.2, 634.20, 634.21, 634.22, 634.3, 634.30, 634.31, 634.32, 634.4, 634.40, 634.41, 634.42, 634.5, 634.50, 634.51, 634.52, 634.6, 634.60, 634.61, 634.62, 634.7, 634.70, 634.71, 634.72, 634.8, 634.80, 634.81, 634.82, 634.9, 634.90, 634.91, 634.92, 635, 635.0, 635.00, 635.01, 635.02, 635.1, 635.10, 635.11, 635.12, 635.2, 635.20, 635.21, 635.22, 635.3, 635.30, 635.31, 635.32, 635.4, 635.40, 635.41, 635.42, 635.5, 635.50, 635.51, 635.52, 635.6, 635.60, 635.61, 635.62, 635.7, 635.70, 635.71, 635.72, 635.8, 635.80, 635.81, 635.82, 635.9, 635.90, 635.91, 635.92, 636, 636.0, 636.00, 636.01, 636.02, 636.1, 636.10, 636.11, 636.12, 636.2, 636.20, 636.21, 636.22, 636.3, 636.30, 636.31, 636.32, 636.4, 636.40, 636.41, 636.42, 636.5, 636.50, 636.51, 636.52, 636.6, 636.60, 636.61, 636.62, 636.7, 636.70, 636.71, 636.72, 636.8, 636.80, 636.81, 636.82, 636.9, 636.90, 636.91, 636.92, 637, 637.0, 637.00, 637.01, 637.02, 637.1, 637.10, 637.11, 637.12, 637.2, 637.20, 637.21, 637.22, 637.3, 637.30, 637.31, 637.32, 637.4, 637.40, 637.41, 637.42, 637.5, 637.50, 637.51, 637.52, 637.6, 637.60, 637.61, 637.62, 637.7, 637.70, 637.71, 637.72, 637.8, 637.80, 637.81, 637.82, 637.9, 637.90, 637.91, 637.92, 638,</p> |

| Measure | Definition                                                                                                                                                                                                                                                                                                                                                                                                                                                                                                                                                                                                                                                                                                                                                                                                                                                                                                                                                                                                                                                                                                                                                                                                                                                                                                                                                                                                                                                                                                                                                                                                                                                                                                                                                                                                                                                                                                                                                                                                                                                                                                                                                                                                                                         |
|---------|----------------------------------------------------------------------------------------------------------------------------------------------------------------------------------------------------------------------------------------------------------------------------------------------------------------------------------------------------------------------------------------------------------------------------------------------------------------------------------------------------------------------------------------------------------------------------------------------------------------------------------------------------------------------------------------------------------------------------------------------------------------------------------------------------------------------------------------------------------------------------------------------------------------------------------------------------------------------------------------------------------------------------------------------------------------------------------------------------------------------------------------------------------------------------------------------------------------------------------------------------------------------------------------------------------------------------------------------------------------------------------------------------------------------------------------------------------------------------------------------------------------------------------------------------------------------------------------------------------------------------------------------------------------------------------------------------------------------------------------------------------------------------------------------------------------------------------------------------------------------------------------------------------------------------------------------------------------------------------------------------------------------------------------------------------------------------------------------------------------------------------------------------------------------------------------------------------------------------------------------------|
|         | <p>638.0, 638.1, 638.2, 638.3, 638.4, 638.5, 638.6, 638.7, 638.8, 638.9, 639, 639.0, 639.1, 639.2, 639.3, 639.4, 639.5, 639.6, 639.8, 639.9, 640, 640.0, 640.00, 640.01, 640.03, 640.8, 640.80, 640.81, 640.83, 640.9, 640.90, 640.91, 640.93, 641, 641.0, 641.00, 641.01, 641.03, 641.1, 641.10, 641.11, 641.13, 641.2, 641.20, 641.21, 641.23, 641.3, 641.30, 641.31, 641.33, 641.8, 641.80, 641.81, 641.83, 641.9, 641.90, 641.91, 641.93, 642, 642.0, 642.00, 642.01, 642.02, 642.03, 642.04, 642.1, 642.10, 642.11, 642.12, 642.13, 642.14, 642.2, 642.20, 642.21, 642.22, 642.23, 642.24, 642.3, 642.30, 642.31, 642.32, 642.33, 642.34, 642.4, 642.40, 642.41, 642.42, 642.43, 642.44, 642.5, 642.50, 642.51, 642.52, 642.53, 642.54, 642.6, 642.60, 642.61, 642.62, 642.63, 642.64, 642.7, 642.70, 642.71, 642.72, 642.73, 642.74, 642.9, 642.90, 642.91, 642.92, 642.93, 642.94, 643, 643.0, 643.00, 643.01, 643.03, 643.1, 643.10, 643.11, 643.13, 643.2, 643.20, 643.21, 643.23, 643.8, 643.80, 643.81, 643.83, 643.9, 643.90, 643.91, 643.93, 644, 644.0, 644.00, 644.03, 644.1, 644.10, 644.13, 644.2, 644.20, 644.21, 645, 645.1, 645.10, 645.11, 645.13, 645.2, 645.20, 645.21, 645.23, 646, 646.0, 646.00, 646.01, 646.03, 646.1, 646.10, 646.11, 646.12, 646.13, 646.14, 646.2, 646.20, 646.21, 646.22, 646.23, 646.24, 646.3, 646.30, 646.31, 646.33, 646.4, 646.40, 646.41, 646.42, 646.43, 646.44, 646.5, 646.50, 646.51, 646.52, 646.53, 646.54, 646.6, 646.60, 646.61, 646.62, 646.63, 646.64, 646.7, 646.70, 646.71, 646.73, 646.8, 646.80, 646.81, 646.82, 646.83, 646.84, 646.9, 646.90, 646.91, 646.93, 647, 647.0, 647.00, 647.01, 647.02, 647.03, 647.04, 647.1, 647.10, 647.11, 647.12, 647.13, 647.14, 647.2, 647.20, 647.21, 647.22, 647.23, 647.24, 647.3, 647.30, 647.31, 647.32, 647.33, 647.34, 647.4, 647.40, 647.41, 647.42, 647.43, 647.44, 647.5, 647.50, 647.51, 647.52, 647.53, 647.54, 647.6, 647.60, 647.61, 647.62, 647.63, 647.64, 647.8, 647.80, 647.81, 647.82, 647.83, 647.84, 647.9, 647.90, 647.91, 647.92, 647.93, 647.94, 648, 648.0, 648.00, 648.01, 648.02, 648.03, 648.04, 648.1, 648.10, 648.11, 648.12, 648.13, 648.14, 648.2, 648.20, 648.21, 648.22, 648.23, 648.24, 648.3, 648.30,</p> |

| Measure | Definition                                                                                                                                                                                                                                                                                                                                                                                                                                                                                                                                                                                                                                                                                                                                                                                                                                                                                                                                                                                                                                                                                                                                                                                                                                                                                                                                                                                                                                                                                                                                                                                                                                                                                                                                                                                                                                                                                                                                                                                                                                                                                                                                                                                                                |
|---------|---------------------------------------------------------------------------------------------------------------------------------------------------------------------------------------------------------------------------------------------------------------------------------------------------------------------------------------------------------------------------------------------------------------------------------------------------------------------------------------------------------------------------------------------------------------------------------------------------------------------------------------------------------------------------------------------------------------------------------------------------------------------------------------------------------------------------------------------------------------------------------------------------------------------------------------------------------------------------------------------------------------------------------------------------------------------------------------------------------------------------------------------------------------------------------------------------------------------------------------------------------------------------------------------------------------------------------------------------------------------------------------------------------------------------------------------------------------------------------------------------------------------------------------------------------------------------------------------------------------------------------------------------------------------------------------------------------------------------------------------------------------------------------------------------------------------------------------------------------------------------------------------------------------------------------------------------------------------------------------------------------------------------------------------------------------------------------------------------------------------------------------------------------------------------------------------------------------------------|
|         | <p>648.31, 648.32, 648.33, 648.34, 648.4, 648.40, 648.41, 648.42, 648.43, 648.44, 648.5, 648.50, 648.51, 648.52, 648.53, 648.54, 648.6, 648.60, 648.61, 648.62, 648.63, 648.64, 648.7, 648.70, 648.71, 648.72, 648.73, 648.74, 648.8, 648.80, 648.81, 648.82, 648.83, 648.84, 648.9, 648.90, 648.91, 648.92, 648.93, 648.94, 649, 649.0, 649.00, 649.01, 649.02, 649.03, 649.04, 649.1, 649.10, 649.11, 649.12, 649.13, 649.14, 649.2, 649.20, 649.21, 649.22, 649.23, 649.24, 649.3, 649.30, 649.31, 649.32, 649.33, 649.34, 649.4, 649.40, 649.41, 649.42, 649.43, 649.44, 649.5, 649.50, 649.51, 649.53, 649.6, 649.60, 649.61, 649.62, 649.63, 649.64, 649.7, 649.70, 649.71, 649.73, 649.8, 649.81, 649.82, 650, 651, 651.0, 651.00, 651.01, 651.03, 651.1, 651.10, 651.11, 651.13, 651.2, 651.20, 651.21, 651.23, 651.3, 651.30, 651.31, 651.33, 651.4, 651.40, 651.41, 651.43, 651.5, 651.50, 651.51, 651.53, 651.6, 651.60, 651.61, 651.63, 651.7, 651.70, 651.71, 651.73, 651.8, 651.80, 651.81, 651.83, 651.9, 651.90, 651.91, 651.93, 652, 652.0, 652.00, 652.01, 652.03, 652.1, 652.10, 652.11, 652.13, 652.2, 652.20, 652.21, 652.23, 652.3, 652.30, 652.31, 652.33, 652.4, 652.40, 652.41, 652.43, 652.5, 652.50, 652.51, 652.53, 652.6, 652.60, 652.61, 652.63, 652.7, 652.70, 652.71, 652.73, 652.8, 652.80, 652.81, 652.83, 652.9, 652.90, 652.91, 652.93, 653, 653.0, 653.00, 653.01, 653.03, 653.1, 653.10, 653.11, 653.13, 653.2, 653.20, 653.21, 653.23, 653.3, 653.30, 653.31, 653.33, 653.4, 653.40, 653.41, 653.43, 653.5, 653.50, 653.51, 653.53, 653.6, 653.60, 653.61, 653.63, 653.7, 653.70, 653.71, 653.73, 653.8, 653.80, 653.81, 653.83, 653.9, 653.90, 653.91, 653.93, 654, 654.0, 654.00, 654.01, 654.02, 654.03, 654.04, 654.1, 654.10, 654.11, 654.12, 654.13, 654.14, 654.2, 654.20, 654.21, 654.23, 654.3, 654.30, 654.31, 654.32, 654.33, 654.34, 654.4, 654.40, 654.41, 654.42, 654.43, 654.44, 654.5, 654.50, 654.51, 654.52, 654.53, 654.54, 654.6, 654.60, 654.61, 654.62, 654.63, 654.64, 654.7, 654.70, 654.71, 654.72, 654.73, 654.74, 654.8, 654.80, 654.81, 654.82, 654.83, 654.84, 654.9, 654.90, 654.91, 654.92, 654.93, 654.94, 655, 655.0, 655.00, 655.01, 655.03,</p> |



| Measure | Definition                                                                                                                                                                                                                                                                                                                                                                                                                                                                                                                                                                                                                                                                                                                                                                                                                                                                                                                                                                                                                                                                                                                                                                                                                                                                                                                                                                                                                                                                                                                                                                                                                                                                                                                                                                                                                                                                                                                                                                                                                                                                                                                                                                                                               |
|---------|--------------------------------------------------------------------------------------------------------------------------------------------------------------------------------------------------------------------------------------------------------------------------------------------------------------------------------------------------------------------------------------------------------------------------------------------------------------------------------------------------------------------------------------------------------------------------------------------------------------------------------------------------------------------------------------------------------------------------------------------------------------------------------------------------------------------------------------------------------------------------------------------------------------------------------------------------------------------------------------------------------------------------------------------------------------------------------------------------------------------------------------------------------------------------------------------------------------------------------------------------------------------------------------------------------------------------------------------------------------------------------------------------------------------------------------------------------------------------------------------------------------------------------------------------------------------------------------------------------------------------------------------------------------------------------------------------------------------------------------------------------------------------------------------------------------------------------------------------------------------------------------------------------------------------------------------------------------------------------------------------------------------------------------------------------------------------------------------------------------------------------------------------------------------------------------------------------------------------|
|         | <p>655.1, 655.10, 655.11, 655.13, 655.2, 655.20, 655.21, 655.23, 655.3, 655.30, 655.31, 655.33, 655.4, 655.40, 655.41, 655.43, 655.5, 655.50, 655.51, 655.53, 655.6, 655.60, 655.61, 655.63, 655.7, 655.70, 655.71, 655.73, 655.8, 655.80, 655.81, 655.83, 655.9, 655.90, 655.91, 655.93, 656, 656.0, 656.00, 656.01, 656.03, 656.1, 656.10, 656.11, 656.13, 656.2, 656.20, 656.21, 656.23, 656.3, 656.30, 656.31, 656.33, 656.4, 656.40, 656.41, 656.43, 656.5, 656.50, 656.51, 656.53, 656.6, 656.60, 656.61, 656.63, 656.7, 656.70, 656.71, 656.73, 656.8, 656.80, 656.81, 656.83, 656.9, 656.90, 656.91, 656.93, 657, 657.00, 657.01, 657.03, 658, 658.0, 658.00, 658.01, 658.03, 658.1, 658.10, 658.11, 658.13, 658.2, 658.20, 658.21, 658.23, 658.3, 658.30, 658.31, 658.33, 658.4, 658.40, 658.41, 658.43, 658.8, 658.80, 658.81, 658.83, 658.9, 658.90, 658.91, 658.93, 659, 659.0, 659.00, 659.01, 659.03, 659.1, 659.10, 659.11, 659.13, 659.2, 659.20, 659.21, 659.23, 659.3, 659.30, 659.31, 659.33, 659.4, 659.40, 659.41, 659.43, 659.5, 659.50, 659.51, 659.53, 659.6, 659.60, 659.61, 659.63, 659.7, 659.70, 659.71, 659.73, 659.8, 659.80, 659.81, 659.83, 659.9, 659.90, 659.91, 659.93, 660, 660.0, 660.00, 660.01, 660.03, 660.1, 660.10, 660.11, 660.13, 660.2, 660.20, 660.21, 660.23, 660.3, 660.30, 660.31, 660.33, 660.4, 660.40, 660.41, 660.43, 660.5, 660.50, 660.51, 660.53, 660.6, 660.60, 660.61, 660.63, 660.7, 660.70, 660.71, 660.73, 660.8, 660.80, 660.81, 660.83, 660.9, 660.90, 660.91, 660.93, 661, 661.0, 661.00, 661.01, 661.03, 661.1, 661.10, 661.11, 661.13, 661.2, 661.20, 661.21, 661.23, 661.3, 661.30, 661.31, 661.33, 661.4, 661.40, 661.41, 661.43, 661.9, 661.90, 661.91, 661.93, 662, 662.0, 662.00, 662.01, 662.03, 662.1, 662.10, 662.11, 662.13, 662.2, 662.20, 662.21, 662.23, 662.3, 662.30, 662.31, 662.33, 663, 663.0, 663.00, 663.01, 663.03, 663.1, 663.10, 663.11, 663.13, 663.2, 663.20, 663.21, 663.23, 663.3, 663.30, 663.31, 663.33, 663.4, 663.40, 663.41, 663.43, 663.5, 663.50, 663.51, 663.53, 663.6, 663.60, 663.61, 663.63, 663.8, 663.80, 663.81, 663.83, 663.9, 663.90, 663.91, 663.93, 664, 664.0, 664.00, 664.01, 664.04, 664.1, 664.10,</p> |

| Measure | Definition                                                                                                                                                                                                                                                                                                                                                                                                                                                                                                                                                                                                                                                                                                                                                                                                                                                                                                                                                                                                                                                                                                                                                                                                                                                                                                                                                                                                                                                                                                                                                                                                                                                                                                                                                                                                                                                                                                                                                                                                                                                                                                                                                                                                                          |
|---------|-------------------------------------------------------------------------------------------------------------------------------------------------------------------------------------------------------------------------------------------------------------------------------------------------------------------------------------------------------------------------------------------------------------------------------------------------------------------------------------------------------------------------------------------------------------------------------------------------------------------------------------------------------------------------------------------------------------------------------------------------------------------------------------------------------------------------------------------------------------------------------------------------------------------------------------------------------------------------------------------------------------------------------------------------------------------------------------------------------------------------------------------------------------------------------------------------------------------------------------------------------------------------------------------------------------------------------------------------------------------------------------------------------------------------------------------------------------------------------------------------------------------------------------------------------------------------------------------------------------------------------------------------------------------------------------------------------------------------------------------------------------------------------------------------------------------------------------------------------------------------------------------------------------------------------------------------------------------------------------------------------------------------------------------------------------------------------------------------------------------------------------------------------------------------------------------------------------------------------------|
|         | <p>664.11, 664.14, 664.2, 664.20, 664.21, 664.24, 664.3, 664.30, 664.31, 664.34, 664.4, 664.40, 664.41, 664.44, 664.5, 664.50, 664.51, 664.54, 664.6, 664.60, 664.61, 664.64, 664.8, 664.80, 664.81, 664.84, 664.9, 664.90, 664.91, 664.94, 665, 665.0, 665.00, 665.01, 665.03, 665.1, 665.10, 665.11, 665.2, 665.20, 665.22, 665.24, 665.3, 665.30, 665.31, 665.34, 665.4, 665.40, 665.41, 665.44, 665.5, 665.50, 665.51, 665.54, 665.6, 665.60, 665.61, 665.64, 665.7, 665.70, 665.71, 665.72, 665.74, 665.8, 665.80, 665.81, 665.82, 665.83, 665.84, 665.9, 665.90, 665.91, 665.92, 665.93, 665.94, 666, 666.0, 666.00, 666.02, 666.04, 666.1, 666.10, 666.12, 666.14, 666.2, 666.20, 666.22, 666.24, 666.3, 666.30, 666.32, 666.34, 667, 667.0, 667.00, 667.02, 667.04, 667.1, 667.10, 667.12, 667.14, 668, 668.0, 668.00, 668.01, 668.02, 668.03, 668.04, 668.1, 668.10, 668.11, 668.12, 668.13, 668.14, 668.2, 668.20, 668.21, 668.22, 668.23, 668.24, 668.8, 668.80, 668.81, 668.82, 668.83, 668.84, 668.9, 668.90, 668.91, 668.92, 668.93, 668.94, 669, 669.0, 669.00, 669.01, 669.02, 669.03, 669.04, 669.1, 669.10, 669.11, 669.12, 669.13, 669.14, 669.2, 669.20, 669.21, 669.22, 669.23, 669.24, 669.3, 669.30, 669.32, 669.34, 669.4, 669.40, 669.41, 669.42, 669.43, 669.44, 669.5, 669.50, 669.51, 669.6, 669.60, 669.61, 669.7, 669.70, 669.71, 669.8, 669.80, 669.81, 669.82, 669.83, 669.84, 669.9, 669.90, 669.91, 669.92, 669.93, 669.94, 670, 670.0, 670.00, 670.02, 670.04, 670.1, 670.10, 670.12, 670.14, 670.2, 670.20, 670.22, 670.24, 670.3, 670.30, 670.32, 670.34, 670.8, 670.80, 670.82, 670.84, 671, 671.0, 671.00, 671.01, 671.02, 671.03, 671.04, 671.1, 671.10, 671.11, 671.12, 671.13, 671.14, 671.2, 671.20, 671.21, 671.22, 671.23, 671.24, 671.3, 671.30, 671.31, 671.33, 671.4, 671.40, 671.42, 671.44, 671.5, 671.50, 671.51, 671.52, 671.53, 671.54, 671.8, 671.80, 671.81, 671.82, 671.83, 671.84, 671.9, 671.90, 671.91, 671.92, 671.93, 671.94, 672, 672.00, 672.02, 672.04, 673, 673.0, 673.00, 673.01, 673.02, 673.03, 673.04, 673.1, 673.10, 673.11, 673.12, 673.13, 673.14, 673.2, 673.20, 673.21, 673.22, 673.23, 673.24, 673.3, 673.30, 673.31, 673.32, 673.33, 673.34, 673.8,</p> |

| Measure | Definition                                                                                                                                                                                                                                                                                                                                                                                                                                                                                                                                                                                                                                                                                                                                                                                                                                                                                                                                                                                                                                                                                                                                                                                                                                                                                                                                                                                                                                                                                                                                                                                                                                                                                                                                                                                                                                                                                                                                                                                                                                                                                                                    |
|---------|-------------------------------------------------------------------------------------------------------------------------------------------------------------------------------------------------------------------------------------------------------------------------------------------------------------------------------------------------------------------------------------------------------------------------------------------------------------------------------------------------------------------------------------------------------------------------------------------------------------------------------------------------------------------------------------------------------------------------------------------------------------------------------------------------------------------------------------------------------------------------------------------------------------------------------------------------------------------------------------------------------------------------------------------------------------------------------------------------------------------------------------------------------------------------------------------------------------------------------------------------------------------------------------------------------------------------------------------------------------------------------------------------------------------------------------------------------------------------------------------------------------------------------------------------------------------------------------------------------------------------------------------------------------------------------------------------------------------------------------------------------------------------------------------------------------------------------------------------------------------------------------------------------------------------------------------------------------------------------------------------------------------------------------------------------------------------------------------------------------------------------|
|         | <p>673.80, 673.81, 673.82, 673.83, 673.84, 674, 674.0, 674.00, 674.01, 674.02, 674.03, 674.04, 674.1, 674.10, 674.12, 674.14, 674.2, 674.20, 674.22, 674.24, 674.3, 674.30, 674.32, 674.34, 674.4, 674.40, 674.42, 674.44, 674.5, 674.50, 674.51, 674.52, 674.53, 674.54, 674.8, 674.80, 674.82, 674.84, 674.9, 674.90, 674.92, 674.94, 675, 675.0, 675.00, 675.01, 675.02, 675.03, 675.04, 675.1, 675.10, 675.11, 675.12, 675.13, 675.14, 675.2, 675.20, 675.21, 675.22, 675.23, 675.24, 675.8, 675.80, 675.81, 675.82, 675.83, 675.84, 675.9, 675.90, 675.91, 675.92, 675.93, 675.94, 676, 676.0, 676.00, 676.01, 676.02, 676.03, 676.04, 676.1, 676.10, 676.11, 676.12, 676.13, 676.14, 676.2, 676.20, 676.21, 676.22, 676.23, 676.24, 676.3, 676.30, 676.31, 676.32, 676.33, 676.34, 676.4, 676.40, 676.41, 676.42, 676.43, 676.44, 676.5, 676.50, 676.51, 676.52, 676.53, 676.54, 676.6, 676.60, 676.61, 676.62, 676.63, 676.64, 676.8, 676.80, 676.81, 676.82, 676.83, 676.84, 676.9, 676.90, 676.91, 676.92, 676.93, 676.94, 677, 678, 678.0, 678.00, 678.01, 678.03, 678.1, 678.10, 678.11, 678.13, 679, 679.0, 679.00, 679.01, 679.02, 679.03, 679.04, 679.1, 679.10, 679.11, 679.12, 679.13, 679.14, V22, V22.0, V22.1, V22.2, V23, V23.0, V23.1, V23.2, V23.3, V23.4, V23.41, V23.42, V23.49, V23.5, V23.7, V23.8, V23.81, V23.82, V23.83, V23.84, V23.85, V23.86, V23.87, V23.89, V23.9, V28, V28.0, V28.1, V28.2, V28.3, V28.4, V28.5, V28.6, V28.8, V28.81, V28.82, V28.89, V28.9</p> <p><b>ICD-10:</b> A34, O01.9, O02.0, O02.1, O02.81, O02.89, O03.0, O03.1, O03.2, O03.30, O03.31, O03.32, O03.33, O03.34, O03.37, O03.39, O03.4, O03.5, O03.6, O03.7, O03.80, O03.81, O03.82, O03.83, O03.84, O03.85, O03.86, O03.87, O03.88, O03.89, O03.9, O04.5, O04.6, O04.7, O04.80, O04.81, O04.82, O04.83, O04.84, O04.85, O04.86, O04.87, O04.88, O04.89, O07.0, O07.1, O07.2, O07.30, O07.31, O07.32, O07.33, O07.34, O07.35, O07.36, O07.37, O07.38, O07.39, O07.4, O08.0, O08.1, O08.2, O08.3, O08.4, O08.5, O08.6, O08.7, O08.81, O08.82, O08.83, O08.89, O08.9, O09.00, O09.10, O09.211, O09.291, O09.30,</p> |

| Measure | Definition                                                                                                                                                                                                                                                                                                                                                                                                                                                                                                                                                                                                                                                                                                                                                                                                                                                                                                                                                                                                                                                                                                                                                                                                                                                                                                                                                                                                                                                                                                                                                                                                                                                                                                                                                                                                                                                                                                                                                                                                                                 |
|---------|--------------------------------------------------------------------------------------------------------------------------------------------------------------------------------------------------------------------------------------------------------------------------------------------------------------------------------------------------------------------------------------------------------------------------------------------------------------------------------------------------------------------------------------------------------------------------------------------------------------------------------------------------------------------------------------------------------------------------------------------------------------------------------------------------------------------------------------------------------------------------------------------------------------------------------------------------------------------------------------------------------------------------------------------------------------------------------------------------------------------------------------------------------------------------------------------------------------------------------------------------------------------------------------------------------------------------------------------------------------------------------------------------------------------------------------------------------------------------------------------------------------------------------------------------------------------------------------------------------------------------------------------------------------------------------------------------------------------------------------------------------------------------------------------------------------------------------------------------------------------------------------------------------------------------------------------------------------------------------------------------------------------------------------------|
|         | <p>O09.40, O09.41, O09.42, O09.43, O09.511, O09.512, O09.513, O09.519, O09.521, O09.522, O09.523, O09.529, O09.611, O09.621, O09.819, O09.821, O09.822, O09.823, O09.829, O09.891, O09.892, O09.893, O09.899, O09.90, O09.91, O09.92, O09.93, O10.011, O10.012, O10.013, O10.019, O10.02, O10.03, O10.111, O10.112, O10.113, O10.119, O10.12, O10.13, O10.211, O10.212, O10.213, O10.219, O10.22, O10.23, O10.311, O10.312, O10.313, O10.319, O10.32, O10.33, O10.411, O10.412, O10.413, O10.419, O10.42, O10.43, O10.911, O10.912, O10.913, O10.919, O10.92, O10.93, O11.1, O11.2, O11.3, O11.9, O12.00, O12.01, O12.02, O12.03, O12.20, O12.21, O12.22, O12.23, O13.1, O13.2, O13.3, O13.9, O14.00, O14.02, O14.03, O14.10, O14.12, O14.13, O14.20, O14.22, O14.23, O14.90, O14.92, O14.93, O15.02, O15.03, O15.1, O15.2, O15.9, O16.1, O16.2, O16.3, O16.9, O20.0, O20.8, O20.9, O21.0, O21.1, O21.2, O21.8, O21.9, O22.00, O22.01, O22.02, O22.03, O22.10, O22.11, O22.12, O22.13, O22.20, O22.21, O22.22, O22.23, O22.30, O22.31, O22.32, O22.33, O22.40, O22.41, O22.42, O22.43, O22.50, O22.51, O22.52, O22.53, O22.8X1, O22.8X2, O22.8X3, O22.8X9, O22.90, O22.91, O22.92, O22.93, O23.00, O23.10, O23.20, O23.30, O23.40, O23.41, O23.42, O23.43, O23.519, O23.529, O23.599, O23.90, O23.91, O23.92, O23.93, O24.319, O24.32, O24.419, O24.429, O24.439, O24.911, O24.912, O24.913, O24.92, O24.93, O25.10, O25.11, O25.12, O25.13, O25.2, O25.3, O26.00, O26.01, O26.02, O26.03, O26.11, O26.12, O26.13, O26.20, O26.21, O26.22, O26.23, O26.41, O26.42, O26.43, O26.50, O26.51, O26.52, O26.53, O26.611, O26.612, O26.613, O26.619, O26.62, O26.811, O26.812, O26.813, O26.819, O26.821, O26.822, O26.823, O26.829, O26.831, O26.832, O26.833, O26.839, O26.841, O26.842, O26.843, O26.849, O26.851, O26.852, O26.853, O26.859, O26.872, O26.873, O26.879, O26.891, O26.892, O26.893, O26.899, O26.90, O30.001, O30.002, O30.003, O30.009, O30.021, O30.022, O30.023, O30.029, O30.101, O30.102, O30.103, O30.109, O30.201,</p> |

| Measure | Definition                                                                                                                                                                                                                                                                                                                                                                                                                                                                                                                                                                                                                                                                                                                                                                                                                                                                                                                                                                                                                                                                                                                                                                                                                                                                                                                                                                                                                                                                                                                                                                                                                                                                                                                                                                                                                                                                                                                                        |
|---------|---------------------------------------------------------------------------------------------------------------------------------------------------------------------------------------------------------------------------------------------------------------------------------------------------------------------------------------------------------------------------------------------------------------------------------------------------------------------------------------------------------------------------------------------------------------------------------------------------------------------------------------------------------------------------------------------------------------------------------------------------------------------------------------------------------------------------------------------------------------------------------------------------------------------------------------------------------------------------------------------------------------------------------------------------------------------------------------------------------------------------------------------------------------------------------------------------------------------------------------------------------------------------------------------------------------------------------------------------------------------------------------------------------------------------------------------------------------------------------------------------------------------------------------------------------------------------------------------------------------------------------------------------------------------------------------------------------------------------------------------------------------------------------------------------------------------------------------------------------------------------------------------------------------------------------------------------|
|         | <p>O30.202, O30.203, O30.209, O30.801, O30.802, O30.803, O30.809, O30.90, O30.91, O30.92, O30.93, O31.00X0, O31.01X0, O31.02X0, O31.03X0, O31.10X0, O31.11X0, O31.30X0, O31.31X0, O31.32X0, O31.33X0, O31.8X10, O31.8X20, O31.8X30, O31.8X90, O32.0XX0, O32.1XX0, O32.2XX0, O32.3XX0, O32.4XX0, O32.6XX0, O32.8XX0, O32.9XX0, O33.0, O33.1, O33.2, O33.3XX0, O33.4XX0, O33.5XX0, O33.6XX0, O33.8, O33.9, O34.00, O34.01, O34.02, O34.03, O34.10, O34.11, O34.12, O34.13, O34.29, O34.30, O34.31, O34.32, O34.33, O34.40, O34.41, O34.42, O34.43, O34.511, O34.512, O34.513, O34.519, O34.521, O34.522, O34.523, O34.529, O34.531, O34.532, O34.533, O34.539, O34.591, O34.592, O34.593, O34.599, O34.60, O34.61, O34.62, O34.63, O34.70, O34.71, O34.72, O34.73, O34.80, O34.81, O34.82, O34.83, O34.90, O34.91, O34.92, O34.93, O35.0XX0, O35.1XX0, O35.2XX0, O35.3XX0, O35.4XX0, O35.5XX0, O35.6XX0, O35.7XX0, O35.8XX0, O35.9XX0, O36.0110, O36.0120, O36.0130, O36.0190, O36.0910, O36.0920, O36.0930, O36.0990, O36.1110, O36.1120, O36.1130, O36.1190, O36.1910, O36.1920, O36.1930, O36.1990, O36.4XX0, O36.5110, O36.5120, O36.5130, O36.5190, O36.5910, O36.5920, O36.5930, O36.5990, O36.60X0, O36.61X0, O36.62X0, O36.63X0, O36.80X0, O36.8120, O36.8130, O36.8190, O36.8210, O36.8220, O36.8230, O36.8290, O36.8910, O36.8920, O36.8930, O36.8990, O36.90X0, O36.91X0, O36.92X0, O36.93X0, O40.1XX0, O40.2XX0, O40.3XX0, O40.9XX0, O41.00X0, O41.01X0, O41.02X0, O41.03X0, O41.1010, O41.1020, O41.1030, O41.1090, O41.1210, O41.1220, O41.1230, O41.1290, O41.1410, O41.1420, O41.1430, O41.1490, O41.8X10, O41.8X20, O41.8X30, O41.8X90, O41.90X0, O41.91X0, O41.92X0, O41.93X0, O42.00, O42.011, O42.012, O42.013, O42.02, O42.10, O42.111, O42.112, O42.113, O42.12, O43.011, O43.019, O43.101, O43.102, O43.103, O43.199, O43.211, O43.212, O43.213, O43.221, O43.222, O43.223, O43.231, O43.232, O43.233, O43.239, O43.811,</p> |

| Measure | Definition                                                                                                                                                                                                                                                                                                                                                                                                                                                                                                                                                                                                                                                                                                                                                                                                                                                                                                                                                                                                                                                                                                                                                                                                                                                                                                                                                                                                                                                                                                                                                                                                                                                                                                                                                                                                                                                                                                                                                                                                           |
|---------|----------------------------------------------------------------------------------------------------------------------------------------------------------------------------------------------------------------------------------------------------------------------------------------------------------------------------------------------------------------------------------------------------------------------------------------------------------------------------------------------------------------------------------------------------------------------------------------------------------------------------------------------------------------------------------------------------------------------------------------------------------------------------------------------------------------------------------------------------------------------------------------------------------------------------------------------------------------------------------------------------------------------------------------------------------------------------------------------------------------------------------------------------------------------------------------------------------------------------------------------------------------------------------------------------------------------------------------------------------------------------------------------------------------------------------------------------------------------------------------------------------------------------------------------------------------------------------------------------------------------------------------------------------------------------------------------------------------------------------------------------------------------------------------------------------------------------------------------------------------------------------------------------------------------------------------------------------------------------------------------------------------------|
|         | <p>O43.812, O43.813, O43.819, O43.91, O43.92, O43.93, O44.00, O44.01, O44.02, O44.03, O44.10, O44.11, O44.12, O44.13, O45.001, O45.002, O45.003, O45.011, O45.012, O45.013, O45.021, O45.022, O45.023, O45.091, O45.092, O45.093, O45.8X1, O45.8X2, O45.8X3, O45.8X9, O45.91, O45.92, O45.93, O46.001, O46.002, O46.003, O46.009, O46.011, O46.012, O46.013, O46.019, O46.021, O46.022, O46.023, O46.029, O46.091, O46.092, O46.093, O46.099, O46.8X1, O46.8X2, O46.8X3, O46.8X9, O46.90, O46.91, O46.92, O46.93, O47.00, O47.02, O47.03, O47.1, O47.9, O48.0, O48.1, O60.00, O60.02, O60.03, O60.10X0, O60.12X0, O60.13X0, O60.14X0, O61.0, O61.1, O61.9, O62.0, O62.1, O62.2, O62.3, O62.4, O62.9, O63.0, O63.1, O63.2, O63.9, O64.0XX0, O64.1XX0, O64.9XX0, O65.4, O65.5, O65.9, O66.0, O66.1, O66.40, O66.5, O66.8, O66.9, O67.0, O67.8, O67.9, O68, O69.0XX0, O69.1XX0, O69.2XX0, O69.3XX0, O69.4XX0, O69.5XX0, O69.81X0, O69.82X0, O69.89X0, O69.9XX0, O70.0, O70.1, O70.3, O70.4, O70.9, O71.00, O71.02, O71.03, O71.1, O71.2, O71.3, O71.4, O71.5, O71.6, O71.7, O71.82, O71.89, O71.9, O72.0, O72.1, O72.2, O72.3, O73.0, O73.1, O74.1, O74.2, O74.3, O74.8, O74.9, O75.0, O75.1, O75.2, O75.3, O75.4, O75.5, O75.81, O75.82, O75.89, O75.9, O76, O77.0, O80, O82, O85, O86.0, O86.11, O86.12, O86.13, O86.19, O86.20, O86.21, O86.22, O86.29, O86.4, O86.81, O86.89, O87.0, O87.1, O87.2, O87.3, O87.4, O87.8, O87.9, O88.011, O88.012, O88.013, O88.019, O88.02, O88.03, O88.111, O88.112, O88.113, O88.119, O88.12, O88.13, O88.211, O88.212, O88.213, O88.219, O88.22, O88.23, O88.311, O88.312, O88.313, O88.319, O88.32, O88.33, O88.811, O88.812, O88.813, O88.819, O88.82, O88.83, O89.09, O89.1, O89.2, O89.8, O89.9, O90.0, O90.1, O90.2, O90.3, O90.4, O90.5, O90.6, O90.81, O90.89, O90.9, O91.011, O91.012, O91.013, O91.019, O91.02, O91.111, O91.112, O91.113, O91.119, O91.12, O91.211, O91.212, O91.213, O91.219, O91.22, O91.23, O92.011, O92.012, O92.013, O92.019, O92.03, O92.111,</p> |

| Measure          | Definition                                                                                                                                                                                                                                                                                                                                                                                                                                                                                                                                                                                                                                                                                                                                                                                                                                                                                                                                                                                                                                                                                                                                                                                                                  |
|------------------|-----------------------------------------------------------------------------------------------------------------------------------------------------------------------------------------------------------------------------------------------------------------------------------------------------------------------------------------------------------------------------------------------------------------------------------------------------------------------------------------------------------------------------------------------------------------------------------------------------------------------------------------------------------------------------------------------------------------------------------------------------------------------------------------------------------------------------------------------------------------------------------------------------------------------------------------------------------------------------------------------------------------------------------------------------------------------------------------------------------------------------------------------------------------------------------------------------------------------------|
|                  | <p>O92.112, O92.113, O92.119, O92.13, O92.20, O92.29, O92.3, O92.5, O92.6, O92.70, O92.79, O94, O98.011, O98.012, O98.013, O98.019, O98.02, O98.03, O98.111, O98.112, O98.113, O98.119, O98.12, O98.13, O98.211, O98.212, O98.213, O98.219, O98.22, O98.23, O98.311, O98.312, O98.313, O98.319, O98.32, O98.33, O98.42, O98.43, O98.511, O98.512, O98.513, O98.519, O98.52, O98.53, O98.611, O98.612, O98.613, O98.619, O98.62, O98.63, O98.811, O98.812, O98.813, O98.819, O98.82, O98.83, O98.911, O98.912, O98.913, O98.919, O98.92, O98.93, O99.011, O99.012, O99.013, O99.019, O99.02, O99.03, O99.111, O99.112, O99.113, O99.119, O99.12, O99.13, O99.210, O99.211, O99.212, O99.213, O99.214, O99.215, O99.280, O99.281, O99.282, O99.283, O99.284, O99.285, O99.320, O99.321, O99.322, O99.323, O99.324, O99.325, O99.330, O99.331, O99.332, O99.333, O99.334, O99.335, O99.340, O99.341, O99.342, O99.343, O99.344, O99.345, O99.350, O99.351, O99.352, O99.353, O99.354, O99.355, O99.411, O99.412, O99.413, O99.419, O99.42, O99.43, O99.53, O99.63, O99.810, O99.814, O99.815, O99.834, O99.835, O99.840, O99.841, O99.842, O99.843, O99.844, O99.845, O99.89, O9A.23, Z33.1, Z33.2, Z34.00, Z34.80, Z34.90</p> |
| Uterine Fibroids | <p>ICD-9: 218.0, 218.1, 218.2, 218.9</p> <p>ICD-10: D25.0, D25.1, D25.2, D25.9</p>                                                                                                                                                                                                                                                                                                                                                                                                                                                                                                                                                                                                                                                                                                                                                                                                                                                                                                                                                                                                                                                                                                                                          |
| Ultrasonography  | <p>CPT/HCPCS: 76830, 76856</p>                                                                                                                                                                                                                                                                                                                                                                                                                                                                                                                                                                                                                                                                                                                                                                                                                                                                                                                                                                                                                                                                                                                                                                                              |
| Pelvic MRI       | <p>ICD-9: 793.6</p> <p>ICD-9 Proc: 88.95</p> <p>ICD-10: R93.5</p>                                                                                                                                                                                                                                                                                                                                                                                                                                                                                                                                                                                                                                                                                                                                                                                                                                                                                                                                                                                                                                                                                                                                                           |

| Measure                     | Definition                                                                                                                                                                                                                                                                                                                                                                                                                                                                                                                                                                                                                                                                                                                                                                                                                                                                 |
|-----------------------------|----------------------------------------------------------------------------------------------------------------------------------------------------------------------------------------------------------------------------------------------------------------------------------------------------------------------------------------------------------------------------------------------------------------------------------------------------------------------------------------------------------------------------------------------------------------------------------------------------------------------------------------------------------------------------------------------------------------------------------------------------------------------------------------------------------------------------------------------------------------------------|
|                             | <p>ICD-10 Proc: 8E0WXBH, BR3CY0Z, BR3CYZZ, BR3CZZZ, BR3FY0Z, BR3FYZZ, BR3FZZZ, BW3GY0Z, BW3GYZZ, BW3GZZZ</p> <p>CPT/HCPCS: 72195, 72196, 72197, 74181, 74182, 74183</p>                                                                                                                                                                                                                                                                                                                                                                                                                                                                                                                                                                                                                                                                                                    |
| Chronic Headaches/Migraines | <p>ICD-9: 346.0, 346.00, 346.01, 346.1, 346.10, 346.11, 346.2, 346.20, 346.21, 346.8, 346.80, 346.81, 346.9, 346.90, 346.91, 784.0</p> <p>ICD-10: G43.001, G43.009, G43.011, G43.019, G43.101, G43.109, G43.111, G43.119, G43.401, G43.409, G43.411, G43.419, G43.501, G43.509, G43.511, G43.519, G43.701, G43.709, G43.711, G43.719, G43.801, G43.809, G43.811, G43.819, G43.821, G43.829, G43.831, G43.839, G43.901, G43.909, G43.911, G43.919, G43.A0, G43.A1, G43.B0, G43.B1, G43.C0, G43.C1, G43.D0, G43.D1, G44.001, G44.009, G44.011, G44.019, G44.021, G44.029, G44.031, G44.039, G44.041, G44.049, G44.051, G44.059, G44.091, G44.099, G44.1, G44.201, G44.209, G44.211, G44.219, G44.221, G44.229, G44.301, G44.309, G44.311, G44.319, G44.321, G44.329, G44.40, G44.41, G44.51, G44.52, G44.53, G44.59, G44.81, G44.82, G44.83, G44.84, G44.85, G44.89, R51</p> |
| Chronic Low Back Pain       | <p>ICD-9: 721.3, 722.10, 722.32, 722.52, 722.93, 724.02, 724.2, 724.3, 724.5, 724.6, 724.70, 724.71, 724.79, 738.5, 739.3, 739.4, 846.0, 846.1, 846.2, 846.3, 846.8, 846.9, 847.2</p> <p>ICD-10: M43.27, M43.28, M46.47, M47.817, M48.06, M51.26, M51.27, M51.36, M51.37, M51.46, M51.47, M51.86, M51.87, M53.2X7, M53.2X8, M53.3, M54.30, M54.89, M99.03, M99.04, M99.83, M99.84, S33.5XXA, S33.6XXA, S33.8XXA, S33.9XXA</p>                                                                                                                                                                                                                                                                                                                                                                                                                                              |
| Fibromyalgia                | ICD-9: 729.1                                                                                                                                                                                                                                                                                                                                                                                                                                                                                                                                                                                                                                                                                                                                                                                                                                                               |



| Measure                        | Definition                                                                                                                                                                                                                                                                                                                                                                                                                                                                                                                                                                                                                                                                                                                                                                                                                                                                                                                                                                                                                                               |
|--------------------------------|----------------------------------------------------------------------------------------------------------------------------------------------------------------------------------------------------------------------------------------------------------------------------------------------------------------------------------------------------------------------------------------------------------------------------------------------------------------------------------------------------------------------------------------------------------------------------------------------------------------------------------------------------------------------------------------------------------------------------------------------------------------------------------------------------------------------------------------------------------------------------------------------------------------------------------------------------------------------------------------------------------------------------------------------------------|
|                                | ICD-10: M79.7, M60.9, M79.1                                                                                                                                                                                                                                                                                                                                                                                                                                                                                                                                                                                                                                                                                                                                                                                                                                                                                                                                                                                                                              |
| Interstitial Cystitis          | ICD-9: 595.1<br>ICD-10: N30.1, N30.10, N30.11                                                                                                                                                                                                                                                                                                                                                                                                                                                                                                                                                                                                                                                                                                                                                                                                                                                                                                                                                                                                            |
| Irritable Bowel Syndrome (IBS) | ICD-9: 564.1<br>ICD-10: K58, K58.0, K58.9                                                                                                                                                                                                                                                                                                                                                                                                                                                                                                                                                                                                                                                                                                                                                                                                                                                                                                                                                                                                                |
| Allergic Rhinitis              | ICD-9: 477, 477.0, 477.1, 477.2, 477.8, 477.9<br>ICD-10: J30.0, J30.1, J30.2, J30.5, J30.81, J30.89, J30.9, J30.8                                                                                                                                                                                                                                                                                                                                                                                                                                                                                                                                                                                                                                                                                                                                                                                                                                                                                                                                        |
| Allergies                      | ICD-9: 477, 477.0, 477.1, 477.2, 477.8, 477.9, 525.66, 995.0, 995.1, 995.2, 995.20, 995.21, 995.22, 995.23, 995.24, 995.27, 995.29, 995.3, 995.4, 995.6, 995.60, 995.61, 995.62, 995.63, 995.64, 995.65, 995.66, 995.67, 995.68, 995.69, 995.7, V14, V14.0, V14.1, V14.2, V14.3, V14.4, V14.5, V14.6, V14.7, V14.8, V14.9, V15.0, V15.01, V15.02, V15.03, V15.04, V15.05, V15.06, V15.07, V15.08, V15.09<br><br>ICD-10: J30, J30.0, J30.1, J30.2, J30.5, J30.8, J30.81, J30.89, J30.9, J31, J31.0, J31.1, J31.2, K08.55, T78, T78.0, T78.00, T78.00XA, T78.00XD, T78.00XS, T78.01, T78.01XA, T78.01XD, T78.01XS, T78.02, T78.02XA, T78.02XD, T78.02XS, T78.03XA, T78.03XD, T78.03XS, T78.04, T78.04XA, T78.04XD, T78.04XS, T78.05, T78.05XA, T78.05XD, T78.05XS, T78.06XA, T78.06XD, T78.06XS, T78.07, T78.07XA, T78.07XD, T78.07XS, T78.08, T78.08XA, T78.08XD, T78.08XS, T78.09, T78.09XA, T78.09XD, T78.09XS, T78.1, T78.1XXA, T78.1XXD, T78.1XXS, T78.2, T78.2XXA, T78.2XXD, T78.2XXS, T78.3, T78.3XXA, T78.3XXD, T78.3XXS, T78.4, T78.40, T78.40XA, |

| Measure                    | Definition                                                                                                                                                                                                                                                                                                                                                                                                           |
|----------------------------|----------------------------------------------------------------------------------------------------------------------------------------------------------------------------------------------------------------------------------------------------------------------------------------------------------------------------------------------------------------------------------------------------------------------|
|                            | <p>T78.40XD, T78.40XS, T78.41XA, T78.41XD, T78.41XS, T78.49, T78.49XA, T78.49XD, T78.49XS, T78.8XXA, T78.8XXD, T78.8XXS, Z88, Z88.0, Z88.1, Z88.2, Z88.3, Z88.4, Z88.5, Z88.6, Z88.7, Z88.8, Z88.9, Z91, Z91.0, Z91.01, Z91.010, Z91.011, Z91.012, Z91.013, Z91.018, Z91.02, Z91.030, Z91.038, Z91.04, Z91.040, Z91.041, Z91.048, Z91.09</p> <p>CPT/HCPCS: 99.12</p>                                                 |
| Asthma                     | <p>ICD-9: 493, 493.0, 493.00, 493.01, 493.02, 493.1, 493.10, 493.11, 493.12, 493.2, 493.20, 493.21, 493.22, 493.8, 493.81, 493.82, 493.9, 493.90, 493.91, 493.92, V17.5</p> <p>ICD-10: J44.0, J44.1, J44.9, J45.20, J45.21, J45.22, J45.901, J45.902, J45.909, J45.990, J45.991, J45.998, Z82.5</p>                                                                                                                  |
| Eczema                     | <p>ICD-9: 692, 692.0, 692.1, 692.2, 692.3, 692.4, 692.5, 692.6, 692.7, 692.70, 692.74, 692.79, 692.8, 692.81, 692.82, 692.83, 692.84, 692.89, 692.9</p> <p>ICD-10: L25, L25.0, L25.1, L25.2, L25.3, L25.4, L25.5, L25.8, L25.9</p>                                                                                                                                                                                   |
| Diabetes Mellitus, Type II | <p>ICD-9: 250.00, 250.02, 250.10, 250.12, 250.20, 250.22, 250.30, 250.32, 250.40, 250.42, 250.50, 250.52, 250.60, 250.62, 250.70, 250.72, 250.80, 250.82, 250.90, 250.92, 250, 250.0</p> <p>ICD-10: E11, E11.01, E11.21, E11.29, E11.311, E11.319, E11.36, E11.39, E11.40, E11.51, E11.618, E11.620, E11.621, E11.622, E11.628, E11.630, E11.638, E11.641, E11.649, E11.65, E11.69, E11.8, E11.9, E13.10, E11.00</p> |
| Fatigue                    | <p>ICD-9: 780.7, 780.71, 780.79</p>                                                                                                                                                                                                                                                                                                                                                                                  |

| Measure         | Definition                                                                                                                                                                                                                                                                                                                                                                                                                                                                                                 |
|-----------------|------------------------------------------------------------------------------------------------------------------------------------------------------------------------------------------------------------------------------------------------------------------------------------------------------------------------------------------------------------------------------------------------------------------------------------------------------------------------------------------------------------|
|                 | ICD-10: R53.81, R53.82, R53.83, G93.3, R53.0, R53.1                                                                                                                                                                                                                                                                                                                                                                                                                                                        |
| Hyperlipidemia  | ICD-9: 272.0, 272.1, 272.2, 272.4<br>ICD-10: E78.1, E78.2, E78.4, E78.5<br>CPT/HCPCS: 0556F, G8585                                                                                                                                                                                                                                                                                                                                                                                                         |
| Hypertension    | ICD-9: 401, 401.0, 401.1, 401.9, 402, 402.0, 402.00, 402.1, 402.10, 402.9, 402.90, 403, 403.0, 403.00, 403.01, 403.1, 403.10, 403.11, 403.9, 403.90, 403.91, 404, 404.0, 404.00, 404.01, 404.02, 404.03, 404.1, 404.10, 404.11, 404.12, 404.13, 404.9, 404.90, 404.91, 404.92, 404.93, 405, 405.0, 405.01, 405.09, 405.1, 405.11, 405.19, 405.9, 405.91, 405.99<br><br>ICD-10: I10, I11, I11.0, I11.9, I12, I12.0, I12.9, I13, I13.0, I13.1, I13.10, I13.11, I13.2, I15, I15.0, I15.1, I15.2, I15.8, I15.9 |
| Hypothyroidism  | ICD-9: 243, 244, 244.0, 244.1, 244.2, 244.3, 244.8, 244.9<br>ICD-10: E00.9, E01.8, E03.2, E03.8, E03.9, E89.0, E02, E03, E03.3                                                                                                                                                                                                                                                                                                                                                                             |
| Thyroid Disease | ICD-9: 240, 240.0, 240.9, 241, 241.0, 241.1, 241.9, 242, 242.0, 242.00, 242.01, 242.1, 242.10, 242.11, 242.2, 242.20, 242.21, 242.3, 242.30, 242.31, 242.4, 242.40, 242.41, 242.8, 242.80, 242.81, 242.9, 242.90, 242.91, 243, 244, 244.0, 244.1, 244.2, 244.3, 244.8, 244.9, 245, 245.0, 245.1, 245.2, 245.3, 245.4, 245.8, 245.9, 246, 246.0, 246.1, 246.2, 246.3, 246.8, 246.9<br><br>ICD-10: E00, E01, E02, E03, E04, E05, E06, E07                                                                    |
| Hysterectomy    | ICD-10 Proc: 0UT04ZZ, 0UT14ZZ, 0UT24ZZ, 0UT44ZZ, 0UT54ZZ, 0UT64ZZ, 0UT74ZZ, 0UT94ZZ, 0UT07ZZ, 0UT08ZZ, 0UT17ZZ, 0UT18ZZ, 0UT27ZZ,                                                                                                                                                                                                                                                                                                                                                                          |

| Measure               | Definition                                                                                                                                                                                                                                                                                                                                                                                                                                                                                                                                                                                                                                                                                                    |
|-----------------------|---------------------------------------------------------------------------------------------------------------------------------------------------------------------------------------------------------------------------------------------------------------------------------------------------------------------------------------------------------------------------------------------------------------------------------------------------------------------------------------------------------------------------------------------------------------------------------------------------------------------------------------------------------------------------------------------------------------|
|                       | <p>0UT28ZZ, 0UT40ZZ, 0UT50ZZ, 0UT60ZZ, 0UT70ZZ, 0UT90ZZ, 0UT0FZZ, 0UT1FZZ, 0UT2FZZ, 0UT5FZZ, 0UT6FZZ, 0UT7FZZ, 0UT9FZZ, 0UTC4ZZ, 0UT47ZZ, 0UT57ZZ, 0UT58ZZ, 0UT67ZZ, 0UT68ZZ, 0UT77ZZ, 0UT78ZZ, 0UT97ZZ</p> <p>CPT/HCPCS: 58150, 58152, 58180, 58200, 58210, 58240, 58260, 58262, 58263, 58267, 58270, 58275, 58280, 58285, 58290, 58291, 58292, 58293, 58294, 58541, 58542, 58543, 58544, 58550, 58552, 58553, 58554, 58570, 58571, 58572, 58573, 58953, 58954, 58956, 68.4, 68.51, 68.61, S2078, 56308</p>                                                                                                                                                                                                  |
| Vitamin D Deficiency  | <p>ICD-9: 268, 268.0, 268.1, 268.2, 268.9</p> <p>ICD-10: E55, M83.9</p>                                                                                                                                                                                                                                                                                                                                                                                                                                                                                                                                                                                                                                       |
| <b>Medication Use</b> |                                                                                                                                                                                                                                                                                                                                                                                                                                                                                                                                                                                                                                                                                                               |
| Antihypertensives     | <p>NDC Generic Name: ACEBUTOLOL HCL, AMILORIDE HCL, AMILORIDE HCL/HYDROCHLOROTHIAZIDE, AMLODIPINE BESYLATE, AMLODIPINE BESYLATE/ATORVASTATIN CALCIUM, AMLODIPINE BESYLATE/BENAZEPRIL HCL, AMLODIPINE BESYLATE/OLMESARTAN MEDOXOMIL, AMLODIPINE BESYLATE/VALSARTAN, AMLODIPINE BESYLATE/VALSARTAN/HYDROCHLOROTHIAZIDE, ATENOLOL, ATENOLOL/CHLORTHALIDONE, AZILSARTAN MEDOXOMIL, AZILSARTAN MEDOXOMIL/CHLORTHALIDONE, BENAZEPRIL HCL, BENAZEPRIL HCL/HYDROCHLOROTHIAZIDE, BEPRIDIL HCL, BETAXOLOL HCL, BISOPROLOL FUMARATE, BISOPROLOL FUMARATE/HYDROCHLOROTHIAZIDE, BUMETANIDE, CANDESARTAN CILEXETIL, CANDESARTAN CILEXETIL/HYDROCHLOROTHIAZIDE, CAPTOPRIL, CAPTOPRIL/HYDROCHLOROTHIAZIDE, CARTEOLOL HCL,</p> |

| Measure | Definition                                                                                                                                                                                                                                                                                                                                                                                                                                                                                                                                                                                                                                                                                                                                                                                                                                                                                                                                                                                                                                                                                                                                                                                                                                                                                                                                                                                                                        |
|---------|-----------------------------------------------------------------------------------------------------------------------------------------------------------------------------------------------------------------------------------------------------------------------------------------------------------------------------------------------------------------------------------------------------------------------------------------------------------------------------------------------------------------------------------------------------------------------------------------------------------------------------------------------------------------------------------------------------------------------------------------------------------------------------------------------------------------------------------------------------------------------------------------------------------------------------------------------------------------------------------------------------------------------------------------------------------------------------------------------------------------------------------------------------------------------------------------------------------------------------------------------------------------------------------------------------------------------------------------------------------------------------------------------------------------------------------|
|         | <p>CARVEDILOL, CARVEDILOL PHOSPHATE, CHLOROTHIAZIDE, CHLOROTHIAZIDE SODIUM, CHLOROTHALIDONE, CLEVIDIPINE BUTYRATE, CLONIDINE, DILTIAZEM HCL, DILTIAZEM HCL IN 0.9 % SODIUM CHLORIDE, DILTIAZEM HCL/DEXTROSE 5 % IN WATER, DILTIAZEM MALATE, DOXAZOSIN MESYLATE, ENALAPRIL MALEATE, ENALAPRIL MALEATE/DILTIAZEM MALATE, ENALAPRIL MALEATE/FELODIPINE, ENALAPRIL MALEATE/HYDROCHLOROTHIAZIDE, ENALAPRILAT DIHYDRATE, EPLERENONE, EPROSARTAN MESYLATE, EPROSARTAN MESYLATE/HYDROCHLOROTHIAZIDE, ESMOLOL HCL, ETHACRYNATE SODIUM, ETHACRYNIC ACID, FELODIPINE, FOSINOPRIL SODIUM, FOSINOPRIL SODIUM/HYDROCHLOROTHIAZIDE, FUROSEMIDE, FUROSEMIDE IN 0.9 % SODIUM CHLORIDE, HYDRALAZINE HCL, HYDRALAZINE HCL/HYDROCHLOROTHIAZIDE, HYDRALAZINE HCL/RESERPINE/HYDROCHLOROTHIAZIDE, HYDROCHLOROTHIAZIDE, HYDROFLUMETHIAZIDE, INDAPAMIDE, IRBESARTAN, ISRADIPINE, LABETALOL HCL, LISINOPRIL, LISINOPRIL/HYDROCHLOROTHIAZIDE, LOSARTAN POTASSIUM, LOSARTAN POTASSIUM/HYDROCHLOROTHIAZIDE, METHYCLOTHIAZIDE, METHYLDOPA, METOLAZONE, METOPROLOL SUCCINATE, METOPROLOL SUCCINATE/HYDROCHLOROTHIAZIDE, METOPROLOL TARTRATE, METOPROLOL TARTRATE/HYDROCHLOROTHIAZIDE, MOEXIPRIL HCL, MOEXIPRIL HCL/HYDROCHLOROTHIAZIDE, NADOLOL, NADOLOL/BENDROFLUMETHIAZIDE, NEBIVOLOL HCL, NICARDIPINE HCL, NICARDIPINE IN DEXTROSE 5 %-WATER, NIFEDIPINE, NIMODIPINE, OLMESARTAN MEDOXOMIL, OLMESARTAN MEDOXOMIL/AMLODIPINE BESYLATE/HYDROCHLOROTHIAZIDE,</p> |

| Measure         | Definition                                                                                                                                                                                                                                                                                                                                                                                                                                                                                                                                                                                                                                                                                                       |
|-----------------|------------------------------------------------------------------------------------------------------------------------------------------------------------------------------------------------------------------------------------------------------------------------------------------------------------------------------------------------------------------------------------------------------------------------------------------------------------------------------------------------------------------------------------------------------------------------------------------------------------------------------------------------------------------------------------------------------------------|
|                 | <p>OLMESARTAN MEDOXOMIL/HYDROCHLOROTHIAZIDE, PENBUTOLOL SULFATE, PERINDOPRIL ARGININE/AMLODIPINE BESYLATE, PERINDOPRIL ERBUMINE, PINDOLOL, POLYTHIAZIDE, PRAZOSIN HCL, PRAZOSIN HCL/POLYTHIAZIDE, PROPRANOLOL HCL, PROPRANOLOL HCL/HYDROCHLOROTHIAZIDE, QUINAPRIL HCL, QUINAPRIL HCL/HYDROCHLOROTHIAZIDE, RAMIPRIL, SOTALOL HCL, SPIRONOLACTONE, TELMISARTAN, TERAZOSIN HCL, TIMOLOL, TIMOLOL MALEATE, TIMOLOL MALEATE/HYDROCHLOROTHIAZIDE, TIMOLOL MALEATE/PF, TORSEMIDE, TRANDOLAPRIL, TRANDOLAPRIL/VERAPAMIL HCL, TRIAMTERENE, TRICHLORMETHIAZIDE, VALSARTAN, VERAPAMIL HCL</p>                                                                                                                               |
| Corticosteroids | <p>AHFSC Therapeutic Category: 68040000</p> <p>NDC Generic Name: PREDNISONE, PREDNISONE MICRONIZED, FLUTICASONE FUROATE, FLUTICASONE FUROATE/VILANTEROL TRIFENATATE, FLUTICASONE PROPIONATE, FLUTICASONE PROPIONATE, MICRONIZED, FLUTICASONE PROPIONATE/SALMETEROL XINAFOATE, FLUTICASONE PROPIONATE/SODIUM CHLORIDE/SODIUM BICARBONATE, AZELASTINE HCL/FLUTICASONE PROPIONATE, AZELASTINE/FLUTICASONE/SODIUM CHLORIDE/SODIUM BICARBONATE, METHYLPREDNISOLONE, METHYLPREDNISOLONE ACETATE, METHYLPREDNISOLONE ACETATE, MICRONIZED, METHYLPREDNISOLONE ACETATE/BUPIVACAINE HCL, METHYLPREDNISOLONE ACETATE/NORFLURANE/HFC 245FA, METHYLPREDNISOLONE SODIUM SUCCINATE, METHYLPREDNISOLONE SODIUM SUCCINATE/PF,</p> |

| Measure | Definition                                                                                                                                                                                                                                                                                                                                                                                                                                                                                                                                                                                                                                                                                                                                                                                                                                                                                                                                                                                                                                                                                                                                                                                                                                                                                                                                                 |
|---------|------------------------------------------------------------------------------------------------------------------------------------------------------------------------------------------------------------------------------------------------------------------------------------------------------------------------------------------------------------------------------------------------------------------------------------------------------------------------------------------------------------------------------------------------------------------------------------------------------------------------------------------------------------------------------------------------------------------------------------------------------------------------------------------------------------------------------------------------------------------------------------------------------------------------------------------------------------------------------------------------------------------------------------------------------------------------------------------------------------------------------------------------------------------------------------------------------------------------------------------------------------------------------------------------------------------------------------------------------------|
|         | <p>METHYLPREDNISOLONE, MICRONIZED, BUDESONIDE, BUDESONIDE, MICRONIZED, BUDESONIDE/FORMOTEROL FUMARATE, PREDNISOLONE, PREDNISOLONE ACETATE, PREDNISOLONE ACETATE, MICRONIZED, PREDNISOLONE SOD PHOSPHATE, PREDNISOLONE SODIUM PHOSPHATE/PEAK FLOW METER, PREDNISOLONE, MICRONIZED, GENTAMICIN SULFATE/PREDNISOLONE ACETATE, NEOMYCIN SULFATE/POLYMYXIN B SULFATE/PREDNISOLONE, SULFACETAMIDE SODIUM/PREDNISOLONE ACETATE, SULFACETAMIDE SODIUM/PREDNISOLONE SODIUM PHOSPHATE, DEXAMETHASONE, DEXAMETHASONE ACETATE, DEXAMETHASONE ACETATE, MICRONIZED, DEXAMETHASONE ISONICOTINATE, DEXAMETHASONE PHOSPHATE, DEXAMETHASONE PHOSPHATE/LIDOCAINE HCL, DEXAMETHASONE SOD PHOSPHATE, DEXAMETHASONE SODIUM PHOSPHATE IN 0.9 % SODIUM CHLORIDE, DEXAMETHASONE SODIUM PHOSPHATE/PF, DEXAMETHASONE, MICRONIZED, DEXAMETHASONE/SALIVA COLLECTION DEVICE, CIPROFLOXACIN HCL/DEXAMETHASONE, NEOMYCIN SULFATE/DEXAMETHASONE SOD PHOSPHATE, NEOMYCIN/POLYMYXIN B SULFATE/DEXAMETHASONE, TOBRAMYCIN/DEXAMETHASONE, BECLOMETHASONE DIPROPIONATE, MOMETASONE FUROATE, MOMETASONE FUROATE/AMMONIUM LACTATE, MOMETASONE FUROATE/FORMOTEROL FUMARATE, FLUDROCORTISONE ACETATE, HYDROCORTISONE, HYDROCORTISONE ACETATE, HYDROCORTISONE ACETATE/ALOE POLYSACCHARIDE/IODOQUINOL, HYDROCORTISONE ACETATE/ALOE VERA, HYDROCORTISONE ACETATE/IODOQUINOL/ALOE POLYSACCHARIDES #2,</p> |

| Measure | Definition                                                                                                                                                                                                                                                                                                                                                                                                                                                                                                                                                                                                                                                                                                                                                                                                                                                                                                                                                                                                                                                                                                                                                                                                                                                                                                                                                                                                                                 |
|---------|--------------------------------------------------------------------------------------------------------------------------------------------------------------------------------------------------------------------------------------------------------------------------------------------------------------------------------------------------------------------------------------------------------------------------------------------------------------------------------------------------------------------------------------------------------------------------------------------------------------------------------------------------------------------------------------------------------------------------------------------------------------------------------------------------------------------------------------------------------------------------------------------------------------------------------------------------------------------------------------------------------------------------------------------------------------------------------------------------------------------------------------------------------------------------------------------------------------------------------------------------------------------------------------------------------------------------------------------------------------------------------------------------------------------------------------------|
|         | <p>HYDROCORTISONE ACETATE/IODOQUINOL/ALOE VERA,<br/> HYDROCORTISONE ACETATE/LIDOCAINE HCL/ALOE VERA,<br/> HYDROCORTISONE ACETATE/LIDOCAINE HCL/SKIN CLEANSER NO.6,<br/> HYDROCORTISONE ACETATE/PRAMOXINE HCL, HYDROCORTISONE<br/> ACETATE/PRAMOXINE HCL/ALOE POLYSACCHARIDE,<br/> HYDROCORTISONE ACETATE/PRAMOXINE HCL/EMOLLIENT BASE,<br/> HYDROCORTISONE ACETATE/PRAMOXINE HCL/SKIN CLEANSER<br/> NO.16, HYDROCORTISONE<br/> ACETATE/PRAMOXINE/EMOLLIENT/PRAMOXINE CMB NO1,<br/> HYDROCORTISONE ACETATE/UREA, HYDROCORTISONE BUTYRATE,<br/> HYDROCORTISONE BUTYRATE/EMOLLIENT BASE, HYDROCORTISONE<br/> CYPIONATE, HYDROCORTISONE HEMISUCCINATE,<br/> HYDROCORTISONE PROBUTATE, HYDROCORTISONE SOD<br/> PHOSPHATE, HYDROCORTISONE SOD SUCCINATE, HYDROCORTISONE<br/> SODIUM SUCCINATE/PF, HYDROCORTISONE VALERATE,<br/> HYDROCORTISONE/ALOE POLYSACCHARIDE/IODOQUINOL,<br/> HYDROCORTISONE/ALOE VERA, HYDROCORTISONE/ALOE<br/> VERA/VITAMIN E ACETATE/VITAMINS A AND D,<br/> HYDROCORTISONE/BENZOCAINE/CHLOROXYLENOL,<br/> HYDROCORTISONE/COLLOIDAL OATMEAL/ALOE/VITAMIN E,<br/> HYDROCORTISONE/EMOLLIENT COMBINATION NO.45,<br/> HYDROCORTISONE/IODOQUINOL, HYDROCORTISONE/MINERAL<br/> OIL/PETROLATUM,WHITE, HYDROCORTISONE/PRAMOXINE<br/> HCL/CHLOROXYLENOL, HYDROCORTISONE/PRAMOXINE<br/> HCL/CHLOROXYLENOL/WATER,<br/> HYDROCORTISONE/PRAMOXINE/CHLOROXYLENOL/BENZALKONIUM,<br/> HYDROCORTISONE/PRAMOXINE/DIOSMIN1/ALOE POLYSAC</p> |



| Measure | Definition                                                                                                                                                                                                                                                                                                                                                                                                                                                                                                                                                                                                                                                                                                                                                                                                                                                                                                                                                                                                                                                                                                                                                                                                                                                                             |
|---------|----------------------------------------------------------------------------------------------------------------------------------------------------------------------------------------------------------------------------------------------------------------------------------------------------------------------------------------------------------------------------------------------------------------------------------------------------------------------------------------------------------------------------------------------------------------------------------------------------------------------------------------------------------------------------------------------------------------------------------------------------------------------------------------------------------------------------------------------------------------------------------------------------------------------------------------------------------------------------------------------------------------------------------------------------------------------------------------------------------------------------------------------------------------------------------------------------------------------------------------------------------------------------------------|
|         | <p>1/POLICOSANOL, HYDROCORTISONE/RESORCINOL/BISMUTH SUBGALLATE/ZINC OXIDE, HYDROCORTISONE/SALICYLIC ACID/SULFUR, HYDROCORTISONE/SALICYLIC ACID/SULFUR/SHAMPOO CMB 1, HYDROCORTISONE/SKIN CLEANSER COMBINATION NO.25, HYDROCORTISONE/SKIN CLEANSER COMBINATION NO.35, HYDROCORTISONE/YERBA SANTA, ACETIC ACID/HYDROCORTISONE, ACYCLOVIR/HYDROCORTISONE, BENZOYL PEROXIDE/HYDROCORTISONE, BENZOYL PEROXIDE/HYDROCORTISONE/SKIN CLEANSER COMB NO.14, CHLORCYCLIZINE HCL/HYDROCORTISONE ACETATE, CHLOROXYLENOL/BENZOCAINE/HYDROCORTISONE ACETATE, CIPROFLOXACIN HCL/HYDROCORTISONE, CLIOQUINOL/HYDROCORTISONE, CLIOQUINOL/HYDROCORTISONE/EMOLLIENT COMBINATION NO.88, CLIOQUINOL/HYDROCORTISONE/PRAMOXINE, DIPHENHYDRAMINE HCL/HYDROCORTISONE, KETOCONAZOLE/HYDROCORTISONE, LIDOCAINE HCL/HYDROCORTISONE ACETATE, LIDOCAINE HCL/HYDROCORTISONE ACETATE/PSYLLIUM HUSK, NEOMYCIN SULFATE/BACITRACIN ZINC/POLYMYXIN B/HYDROCORTISONE, NEOMYCIN SULFATE/COLISTIN SULFATE/HYDROCORTISONE, NEOMYCIN SULFATE/HYDROCORTISONE, NEOMYCIN SULFATE/HYDROCORTISONE ACETATE, NEOMYCIN SULFATE/POLYMYXIN B SULFATE/BUFFERS/HYDROCORTISONE, NEOMYCIN SULFATE/POLYMYXIN B SULFATE/HYDROCORTISONE, NEOMYCIN/BACITRACIN/POLYMYXIN B/HYDROCORTISONE, OXYTETRACYCLINE HCL/HYDROCORTISONE ACETATE, POLYMYXIN</p> |

| Measure               | Definition                                                                                                                                                                                                                                                                                                                                                                                                                                                                                                                                                                                                                                                                             |
|-----------------------|----------------------------------------------------------------------------------------------------------------------------------------------------------------------------------------------------------------------------------------------------------------------------------------------------------------------------------------------------------------------------------------------------------------------------------------------------------------------------------------------------------------------------------------------------------------------------------------------------------------------------------------------------------------------------------------|
|                       | B SULFATE/HYDROCORTISONE,<br>PYRILAMINE/PHENIRAMINE/CHLORPHENIRAMINE/HYDROCORTISONE                                                                                                                                                                                                                                                                                                                                                                                                                                                                                                                                                                                                    |
| Non-Opioid Analgesics | <p>AHFSC Therapeutic Category: 280804</p> <p>NDC Generic Name: IBUPROFEN, IBUPROFEN LYSINE/PF, IBUPROFEN/CAFFEINE/VITAMINS B1, B2, B6, &amp; B12, IBUPROFEN/DIETARY SUPPLEMENT,MISC. CB.11, IBUPROFEN/FAMOTIDINE, NAPROXEN/DIETARY SUPPLEMENT,MISC. CB.11, NAPROXEN, NAPROXEN SODIUM, DICLOFENAC SODIUM, DICLOFENAC SODIUM, MICRONIZED, DICLOFENAC SUBMICRONIZED, DICLOFENAC SODIUM/MISOPROSTOL, KETOPROFEN, KETOPROFEN, MICRONIZED, FLURBIPROFEN, FLURBIPROFEN SODIUM, MEFENAMIC ACID, MECLOFENAMATE SODIUM</p>                                                                                                                                                                       |
| Opioid Analgesics     | <p>NDC Generic Name: FENTANYL, METHADONE HCL, METHADONE HYDROCHLORIDE IN 0.9 % SODIUM CHLORIDE, OXYCODONE HCL, OXYCODONE HCL/ACETAMINOPHEN, OXYCODONE HCL/ASPIRIN, OXYCODONE HCL/OXYCODONE TEREPHTHALATE/ASPIRIN, OXYCODONE MYRISTATE, OXYCODONE/ASPIRIN, IBUPROFEN/OXYCODONE HCL, CODEINE PHOSPHATE, CODEINE PHOSPHATE/BROMODIPHENHYDRAMINE HCL, CODEINE PHOSPHATE/BUTALBITAL/ASPIRIN/CAFFEINE, CODEINE PHOSPHATE/GUAIFENESIN, CODEINE PHOSPHATE/PYRILAMINE MALEATE, CODEINE POLISTIREX/CHLORPHENIRAMINE POLISTIREX, CODEINE SULFATE, CODEINE/CALCIUM IODIDE, ACETAMINOPHEN WITH CODEINE PHOSPHATE, ASPIRIN/CODEINE PHOSPHATE, MORPHINE SULFATE, MORPHINE SULFATE IN 0.9 % SODIUM</p> |

| Measure | Definition                                                                                                                                                                                                                                                                                                                                                                                                                                                                                                                                                                                                                                                                                                                                                                                                                                                                                                                                                                                                                                                                                                                                                                                                                                                                                                                                                                    |
|---------|-------------------------------------------------------------------------------------------------------------------------------------------------------------------------------------------------------------------------------------------------------------------------------------------------------------------------------------------------------------------------------------------------------------------------------------------------------------------------------------------------------------------------------------------------------------------------------------------------------------------------------------------------------------------------------------------------------------------------------------------------------------------------------------------------------------------------------------------------------------------------------------------------------------------------------------------------------------------------------------------------------------------------------------------------------------------------------------------------------------------------------------------------------------------------------------------------------------------------------------------------------------------------------------------------------------------------------------------------------------------------------|
|         | <p>CHLORIDE, MORPHINE SULFATE IN 0.9 % SODIUM CHLORIDE/PF, MORPHINE SULFATE IN SODIUM CHLORIDE, ISO-OSMOTIC/PF, MORPHINE SULFATE LIPOSOMAL/PF, MORPHINE SULFATE/DEXTROSE 5 % IN WATER, MORPHINE SULFATE/DEXTROSE 5%-WATER/PF, MORPHINE SULFATE/NALTREXONE HCL, MORPHINE SULFATE/PF, HYDROMORPHONE HCL, HYDROMORPHONE HCL IN 0.9 % SODIUM CHLORIDE, HYDROMORPHONE HCL IN 0.9 % SODIUM CHLORIDE/PF, HYDROMORPHONE HCL IN DEXTROSE 5 %-WATER/PF, HYDROMORPHONE HCL/BUPIVACAINE HCL IN 0.9% SODIUM CHLORIDE/PF, HYDROMORPHONE HCL/GUAIFENESIN, HYDROMORPHONE HCL/PF, HYDROMORPHONE HCL/ROPIVACAINE IN 0.9 % SODIUM CHLORIDE/PF, OXYMORPHONE HCL, LEVORPHANOL TARTRATE, MEPERIDINE HCL, MEPERIDINE HCL IN 0.9 % SODIUM CHLORIDE, MEPERIDINE HCL IN 0.9 % SODIUM CHLORIDE/PF, MEPERIDINE HCL/ATROPINE SULFATE, MEPERIDINE HCL/PF, MEPERIDINE HCL/PROMETHAZINE HCL, OPIUM TINCTURE, OPIUM/BELLADONNA ALKALOIDS, HYDROCODONE BIT/CHLORPHENIRAMINE/PSEUDOEPHEDRINE/GUAIFENESIN, HYDROCODONE BITART/BROMPHENIRAMINE MAL/PSEUDOEPHEDRINE HCL, HYDROCODONE BITART/CHLORPHENIRAMINE MALEATE/PSEUDOEPHEDRINE, HYDROCODONE BITARTRATE, HYDROCODONE BITARTRATE/ACETAMINOPHEN, HYDROCODONE BITARTRATE/ACETAMINOPHEN/DIETARY SUPPLEMENT #11, HYDROCODONE BITARTRATE/ASPIRIN, HYDROCODONE BITARTRATE/CARBINOXAMINE MAL/PSEUDOEPHEDRINE HCL, HYDROCODONE BITARTRATE/CHLORPHENIRAMINE MALEATE,</p> |

| Measure                             | Definition                                                                                                                                                                                                                                                                                                                                                                                                                                                                                                                                                                                                                                                                                                                                   |
|-------------------------------------|----------------------------------------------------------------------------------------------------------------------------------------------------------------------------------------------------------------------------------------------------------------------------------------------------------------------------------------------------------------------------------------------------------------------------------------------------------------------------------------------------------------------------------------------------------------------------------------------------------------------------------------------------------------------------------------------------------------------------------------------|
|                                     | <p>HYDROCODONE BITARTRATE/HOMATROPINE, HYDROCODONE BITARTRATE/HOMATROPINE METHYLBROMIDE, HYDROCODONE BITARTRATE/PSEUDOEPHEDRINE HCL/GUAIFENESIN, HYDROCODONE POLISTIREX/CHLORPHENIRAMINE POLISTIREX, HYDROCODONE TANNATE/CHLORPHENIRAMINE TANNATE, HYDROCODONE/IBUPROFEN, TRAMADOL HCL, TRAMADOL HCL/ACETAMINOPHEN, TRAMADOL HCL/DIETARY SUPPLEMENT,MISC. CB.11</p>                                                                                                                                                                                                                                                                                                                                                                          |
| <p>Combined Oral Contraceptives</p> | <p>ICD-9: V25.01, V25.41</p> <p>ICD-10: Z30.41, Z30.011</p> <p>AHFSC Therapeutic Category: 68120000</p> <p>NDC Generic: LEVONORGESTREL/ETHINYL ESTRADIOL/FERROUS BISGLYCINATE, DESOGESTREL-ETHINYL ESTRADIOL/ETHINYL ESTRADIOL, DROSPIRENONE/ETHINYL ESTRADIOL/LEVOMEFOLATE CALCIUM, NORETHINDRONE-ETHINYL ESTRADIOL/FERROUS FUMARATE, LEVONORGESTREL/ETHINYL ESTRADIOL AND ETHINYL ESTRADIOL, NORGESTREL-ETHINYL ESTRADIOL, ETHYNODIOL DIACETATE-ETHINYL ESTRADIOL, ETHINYL ESTRADIOL/DROSPIRENONE, DESOGESTREL-ETHINYL ESTRADIOL, NORETHINDRONE ACETATE-ETHINYL ESTRADIOL, NORETHINDRONE ACETATE-ETHINYL ESTRADIOL/FERROUS FUMARATE, NORGESTIMATE-ETHINYL ESTRADIOL, LEVONORGESTREL-ETHINYL ESTRADIOL, NORETHINDRONE-ETHINYL ESTRADIOL</p> |

| Measure | Definition       |
|---------|------------------|
|         | CPT/HCPCS: S4993 |

Web Table 3. Additional Baseline Characteristics of Women With and Without Endometriosis,  
Optum Clinformatics® DataMart, 2000-2019<sup>a,b</sup>

|                                              | Endometriosis<br>N=72,677 | No Endometriosis<br>N=147,251 | Difference           |
|----------------------------------------------|---------------------------|-------------------------------|----------------------|
| <b>Immunological Comorbidities</b>           |                           |                               |                      |
| Allergic Rhinitis                            | 12,650 (17.4%)            | 25,992 (17.7%)                | -0.2% (-0.6%, -0.1%) |
| Allergies                                    | 16,202 (22.3%)            | 30,358 (20.6%)                | 1.7% (1.3%, 2.0%)    |
| Asthma                                       | 6,362 (8.8%)              | 9,526 (6.5%)                  | 2.3% (2.0%, 2.5%)    |
| <b>Other Comorbidities or Medication Use</b> |                           |                               |                      |
| Diabetes Mellitus, Type II                   | 2,320 (3.2%)              | 4,520 (3.1%)                  | 0.1% (0.0%, 0.3%)    |
| Fatigue                                      | 14,506 (20.0%)            | 26,583 (18.1%)                | 1.9% (1.6%, 2.3%)    |
| Hyperlipidemia                               | 8,461 (11.6%)             | 19,770 (13.4%)                | -1.8% (-2.1%, -1.5%) |
| Hypertension                                 | 6,026 (8.3%)              | 11,642 (7.9%)                 | 0.4% (0.1%, 0.6%)    |
| Hypothyroidism                               | 6,570 (9.0%)              | 12,111 (8.2%)                 | 0.8% (0.6%, 1.1%)    |
| Thyroid Disease                              | 7,975 (11.0%)             | 15,480 (10.5%)                | 0.5% (0.2%, 0.7%)    |
| Vitamin D Deficiency                         | 2,052 (2.8%)              | 4,505 (3.1%)                  | -0.2% (-0.4%, -0.1%) |
| Use of Antihypertensives                     | 5,401 (7.4%)              | 10,486 (7.1%)                 | 0.3% (0.1%, 0.5%)    |

<sup>a</sup>Patients were excluded if they had a prior diagnosis of depression (dx OR rx), anxiety (dx OR rx), self-directed violence, prior prescription fill of an anti-anxiety or anti-depressant medication, prior diagnosis of cancer, or prior hysterectomy.

<sup>b</sup>All values are n (%) unless otherwise specified.

Web Table 4. Incidence of Anxiety and Depression Based on Alternative Outcome Definitions, Optum Clinformatics® DataMart, 2000-2019

|                                  | Outcome: Diagnosis <i>or</i> Medication Use |                               | Outcome: Diagnosis <i>and</i> Medication Use |                               |
|----------------------------------|---------------------------------------------|-------------------------------|----------------------------------------------|-------------------------------|
|                                  | Endometriosis<br>N=72,677                   | No Endometriosis<br>N=147,251 | Endometriosis<br>N=72,677                    | No Endometriosis<br>N=147,251 |
| <b>Incident Anxiety</b>          |                                             |                               |                                              |                               |
| No. of Events                    | 17,898                                      | 28,602                        | 5,189                                        | 8,291                         |
| Incidence per 1,000 Person-Years | 146.9                                       | 86.4                          | 34.1                                         | 21.4                          |
| <b>Incident Depression</b>       |                                             |                               |                                              |                               |
| No. of Events                    | 12,361                                      | 20,038                        | 4,460                                        | 6,966                         |
| Incidence per 1,000 Person-Years | 90.8                                        | 56.3                          | 28.9                                         | 17.8                          |

<sup>a</sup>Patients began follow-up 1 day after cohort entry and were censored on occurrence of the outcome, hysterectomy, death, disenrollment or end of data.



Web Table 5. Association Between Endometriosis and Anxiety and Depression Based on Alternative Outcome Definitions, Optum Clinformatics® DataMart, 2000-2019<sup>a</sup>

|                                     | Crude |            | Adjusted <sup>b</sup> |            |
|-------------------------------------|-------|------------|-----------------------|------------|
|                                     | HR    | 95% CI     | HR                    | 95% CI     |
| <b>Incident Anxiety</b>             |       |            |                       |            |
| Diagnosis <i>or</i> Medication Use  | 1.63  | 1.60, 1.67 | 1.58                  | 1.55, 1.61 |
| Diagnosis <i>and</i> Medication Use | 1.57  | 1.51, 1.62 | 1.50                  | 1.45, 1.56 |
| <b>Incident Depression</b>          |       |            |                       |            |
| Diagnosis <i>or</i> Medication Use  | 1.55  | 1.51, 1.58 | 1.52                  | 1.48, 1.56 |
| Diagnosis <i>and</i> Medication Use | 1.58  | 1.52, 1.64 | 1.55                  | 1.49, 1.62 |

Abbreviations: CI, confidence interval; HR, hazard ratio.

<sup>a</sup>Patients began follow-up 1 day after cohort entry and were censored on occurrence of the outcome, hysterectomy, death, disenrollment or end of data.

<sup>b</sup>Multivariable models adjusted for race/ethnicity, region of residence, uterine fibroids, chronic headaches/migraines, chronic lower back pain, fibromyalgia, asthma, diabetes mellitus type 2, fatigue, hypertension, hypothyroidism, vitamin D deficiency, use of opioid analgesics, use of antihypertensives, and use of corticosteroids.

Web Table 6. Incidence of Anxiety, Depression, and Self-directed Violence in Women With Laparoscopically Confirmed Endometriosis and Women Without Endometriosis, Optum Clinformatics® DataMart, 2000-2019<sup>a</sup>

|                                        | Laparoscopically Confirmed<br>Endometriosis<br>N=38,623 | No Endometriosis<br>N=77,823 |
|----------------------------------------|---------------------------------------------------------|------------------------------|
| <b>Incident Anxiety</b>                |                                                         |                              |
| No. of Events                          | 4,502                                                   | 8,069                        |
| Incidence per 1,000 Person-Years       | 54.4                                                    | 40.1                         |
| <b>Incident Depression</b>             |                                                         |                              |
| No. of Events                          | 3,876                                                   | 6,682                        |
| Incidence per 1,000 Person-Years       | 46.2                                                    | 32.7                         |
| <b>Incident Self-Directed Violence</b> |                                                         |                              |
| No. of Events                          | 73                                                      | 99                           |
| Incidence per 1,000 Person-Years       | 0.78                                                    | 0.44                         |

<sup>a</sup>Patients began follow-up 1 day after cohort entry and were censored on occurrence of the outcome, hysterectomy, death, disenrollment or end of data.

Web Table 7. Association Between Laparoscopically Confirmed Endometriosis and Anxiety, Depression, and Self-directed Violence, Optum Clinformatics® DataMart, 2000-2019<sup>a</sup>

|                                        | Crude |            | Adjusted <sup>b</sup> |            |
|----------------------------------------|-------|------------|-----------------------|------------|
|                                        | HR    | 95% CI     | HR                    | 95% CI     |
| <b>Incident Anxiety</b>                | 1.34  | 1.29, 1.39 | 1.16                  | 1.10, 1.21 |
| <b>Incident Depression</b>             | 1.38  | 1.32, 1.43 | 1.25                  | 1.19, 1.32 |
| <b>Incident Self-Directed Violence</b> | 1.78  | 1.31, 2.41 | 1.29                  | 0.87, 1.92 |

Abbreviations: CI, confidence interval; HR, hazard ratio.

<sup>a</sup>Patients began follow-up 1 day after cohort entry and were censored on occurrence of the outcome, hysterectomy, death, disenrollment or end of data.

<sup>b</sup>Multivariable models adjusted for race/ethnicity, region of residence, uterine fibroids, chronic headaches/migraines, chronic lower back pain, fibromyalgia, asthma, diabetes mellitus type 2, fatigue, hypertension, hypothyroidism, vitamin D deficiency, use of opioid analgesics, use of antihypertensives, and use of corticosteroids.
